# Supplementary material for: Bifunctional and regenerable molecular electrode for water electrolysis at neutral pH
Source: Royal Society of Chemistry journal article supplement (doi:10.1039/d3ta00071k), 2023-01-01
Supplement: d3ta00071k1.pdf [file d3ta00071k1.pdf]

## Supporting Information

# Bifunctional and Regenerable Molecular Electrode for Water

## Electrolysis at Neutral pH

Biswanath Das,<sup>\* a</sup> Esteban Alejandro Toledo-Carrillo,<sup>b</sup> Guoqi Li,<sup>c</sup> Jonas Ståhle,<sup>a</sup> Thomas Thersleff,<sup>d</sup> Jianhong Chen,<sup>d</sup> Lin Li, Fei Ye,<sup>b</sup> Adam Slabon,<sup>e</sup> Mats Göthelid,<sup>f</sup> Tsu-Chien Weng,<sup>c</sup> Jodie A. Yuwono,<sup>g</sup> Priyank V. Kumar,<sup>g</sup> Oscar Verho,<sup>\* h</sup> Markus D. Kärkäs,<sup>i</sup> Joydeep Dutta,<sup>b</sup> and Björn Åkermark<sup>\* a</sup>

- 
- Dr. Biswanath Das, Dr. Jonas Ståhle, Prof. Björn Åkermark  
Department of Organic Chemistry, Arrhenius Laboratory  
Stockholm University, Svante Arrhenius väg 16C, 10691 Stockholm, Sweden.  
E-mail: [das.biswanath85@gmail.com](mailto:das.biswanath85@gmail.com)/[biswanath.das@su.se](mailto:biswanath.das@su.se), [bjorn.akermark@su.se](mailto:bjorn.akermark@su.se)
- [b] Mr. Esteban A. Toledo-Carrillo, Dr. Fei Ye, Prof. Joydeep Dutta  
Department of Applied Physics, KTH Royal Institute of Technology,  
Hannes Alfvéns väg 12, 114 19 Stockholm, Sweden
- [c] Mr. Guoqi Li, Dr. Lin Li, Prof. Tsu-Chien Weng  
School of Physical Science and Technology, ShanghaiTech University,  
Shanghai 201210, China
- [d] Dr. Thomas Thersleff, Mr. Jianhong Chen  
Department of Materials and Environmental Chemistry,  
Stockholm University, Svante Arrhenius väg 16C, 10691 Stockholm, Sweden
- [e] Professor Dr. Adam Slabon  
Inorganic Chemistry, University of Wuppertal  
Gaußstr. 20, 42119 Wuppertal, Germany
- [f] Prof. Mats Göthelid  
Material and Nanophysics, KTH Royal Institute of Technology,  
Hannes Alfvéns väg 12, 114 19 Stockholm, Sweden
- [g] Dr. Jodie Yuwono, Asst. Prof. Priyank V Kumar  
School of Chemical Engineering, University of New South Wales,  
Sydney 2052, Australia
- [h] Assoc. Prof. Oscar Verho  
Department of Medicinal Chemistry, Biomedicinskt Centrum BMC,  
Uppsala University, SE-75123 Uppsala, Sweden  
E-mail: [oscar.verho@ilk.uu.se](mailto:oscar.verho@ilk.uu.se)
- [i] Assoc. Prof. Markus D. Kärkäs  
Department of Chemistry, KTH Royal Institute of Technology,  
SE-10044 Stockholm, Sweden

### Methods and Materials:

All reagents and solvents were commercially available and used as received, unless otherwise noted. Reagent grade organic solvents were used for the purification and HPLC grade solvents were used for synthesis and other operations.

NMR spectra were recorded on a Bruker Avance II 500 MHz spectrometer using a 5 mm BBO probe equipped with Z-gradients. Peaks were referenced to the internal solvent peaks ( $\delta$ H 3.31 for MeOD).

HRMS spectra were recorded in positive mode on a Bruker Daltonics MicroTOF mass spectrometer using electrospray ionization as the ion source. The peaks were referenced to a serially injected sample of 10 mM sodium formate. The data was exported and presented using GNU Octave. ESI-HRMS measurements were performed using the Bruker Daltonics microTOF mass spectrometer (direct injection, positive mode, all samples in MeOH).

Unless otherwise mentioned, all the DFT calculations were implemented using the Vienna ab-initio simulation package (VASP)<sup>1,2</sup> with the core and valence electronic interactions being modelled using the projector augmented wave (PAW) method<sup>3,4</sup>. The Perdew-Burke-Ernzerhof (PBE) exchange-correlation functional<sup>5</sup> was employed. The wavefunction were expanded with a kinetic energy cut-off of 500 eV and a Gamma k-points were used. Geometrical optimizations were achieved by relaxing all ionic position and supercell vectors until the Hellman-Feynmann forces were less than 0.01 eV Å<sup>-1</sup>. The dispersion correction was also considered in this study by using DFT-D3 method<sup>6</sup>. The Gibbs reaction energy were computed using the contribution of adsorption reaction energy and zero-point energy at 298 K and solvation corrections for each system<sup>7</sup>.

#### **Additional Characterization details:**

##### **Electron microscopy study:**

A collection of aggregates was located on the TEM grid and an overview of this is presented in Figure S10a. This region was scanned with a focused electron probe to simultaneously collect hyperspectral data cubes containing Energy Dispersive X-Ray (EDX) as well as low-loss and core-loss Electron Energy-Loss Spectra (EELS). The EDX spectrum extracted by integrating over the entire aggregate is presented in Figure S10f. While this spectrum is displayed in the energy range from 0 – 3 keV, data were collected up to 20 keV, permitting use of the Ru-K<sub>α</sub> edge, which was used for quantification. Carbon, Nitrogen, Oxygen, and Ruthenium are all clearly retrieved. Additional peaks corresponding to Aluminium, Zinc, and Sulfur are likely impurities introduced in low concentrations during the sample preparation routine, while the Copper signal originates from the TEM grid. The catalyst composition estimated from this EDX spectrum is presented in Table S1 below and reveals that Ru is found in concentrations of less than 1 AF%. It should be noted, since this EDX spectrum is integrated over the entire field of view, it will contain additional Carbon and Oxygen contributions from hydrocarbon contamination and the support film.

Small quantities of Al, Cu and Zn were also found in the EDX spectra (Figure S10b). These elements come from the metal salts used during the activation of the carbon fibers by wet impregnation and carbonization.<sup>8,9</sup>

The background subtracted spectrum is presented in blue and this was subsequently deconvolved using the simultaneously acquired electron energy loss spectroscopy (EELS) to remove plural scattering, as shown in the red spectrum in the foreground. In Figure S10f-g, an EELS spectrum extracted from a thin region of the aggregate is presented. The raw EELS data are shown in green along with the pre-edge background, which was modelled with an inverse power law function in the energy range 250 – 275 eV. A very prominent C-K edge including some interesting fine structure features dominates this spectrum. In addition, weak intensities at the onset energies for N-K, O-K, and Ru-M<sub>4,5</sub> were observed.

Additional peaks in the EDX analysis corresponding to Aluminium, Zinc, and Sulfur are likely impurities introduced in low concentrations during the sample preparation routine, while the Copper signal originates from the TEM grid.

The catalyst composition estimated from this EDX spectrum is presented in Table S1 below and reveals that Ru is found in concentrations of less than 1 AF%. It should be noted, since this EDX spectrum is integrated over the entire field of view, it will contain additional Carbon and Oxygen contributions from hydrocarbon contamination and the support film.

Small quantities of Al, Cu and Zn were also found in the EDX spectra (Figure S10b). These elements come from the metal salts used during the activation of the carbon fibers by wet impregnation and carbonization.<sup>8,9</sup>

The background subtracted spectrum is presented in blue and this was subsequently deconvolved using the simultaneously acquired electron energy loss spectroscopy (EELS) to remove plural scattering, as shown in the red spectrum in the foreground.

### **X-ray photoelectron spectroscopy**

In addition to the discussion in the manuscript, higher carbon loading of catalysts intensifies the carbon peaks and reduces the peak corresponding to CF<sub>2</sub> units. Additionally, the shoulder that can be observed around 293 eV indicates a perturbation in the C-F surrounding due to the anchoring of the catalyst structure.

**UV-Vis spectroscopy**- The identity of the molecular catalyst onto the carbon cloth was tested by UV-Vis before and after the electrolysis by immersion in either a highly acidic (1.0M HCl) or alkaline solution (1.0M KOH) for 24 h (Figure S22). The acid and alkaline solution were analyzed using UV-Vis spectrometer Lambda750 (PerkinElmer) to detect the presence of molecular catalyst after dissolution. Similarly, the concentration of Ru was measured by Inductive Coupled Plasma Optical Emission Spectroscopy (ICP-OES) using iCAP 6500 spectrometer (Thermo Scientific).

**Fourier Transform Infrared Spectroscopy (FTIR)** using a Nicolet iS10 Spectrometer (Thermo Scientific) equipped with an ATR accessory. Figure S10 shows the FTIR spectra of treated and untreated carbon cloth, and in these, a characteristic band assigned to aromatic C=C stretching can be observed at 1520 cm<sup>-1</sup>.<sup>10</sup> A strong and broad band appeared after fluorination of carbon cloth at about 1070 cm<sup>-1</sup>, which corresponds to the stretching of C-F bonds, and this band was present in all the treated samples.<sup>11</sup> No additional signal could be observed after pyridine ligand grafting, which was most likely due to the small amount incorporated. However, anchoring of the pyridine linker was confirmed by XPS (*vide supra*). The absence of new features in the spectra confirmed that no significant degradation took place during the surface modification. After anchoring of the molecular catalyst, a weak band was found at 1718 cm<sup>-1</sup>, corresponding to C=O stretching of the carboxylate unit in the Ru complex. Furthermore, a weakening of the C-F stretching band was observed after catalyst anchoring, which was in line with the changes of the C-F peak in the XPS spectra. These observations, together with the presence of new C-F bands at about 293 eV in the XPS spectra, suggest chemical interaction between fluorine and the atoms of the molecular catalyst. These interactions can most likely be ascribed to hydrogen bonding between the fluorines of the PFCC and the protons of the water molecule in the molecular catalyst.

## Raman spectral analysis

All samples displayed two prominent bands at 1330 and 1600  $\text{cm}^{-1}$  and a broad band centered at about 2500  $\text{cm}^{-1}$ , which were attributed to first and second order Raman scattering of carbonaceous materials (Figure S11). The Raman active mode of highly ordered carbon material corresponds to the G band centered at 1580  $\text{cm}^{-1}$ , assigned to the in-plane  $E_{2g}$  vibrational mode. However, in activated carbon fibers, a highly disordered structure is present, giving rise to a new strong set of bands in the spectra, which is usually denoted as the D bands. A more detailed analysis shows that the D and G bands can be deconvoluted into four different signals, which arise from different type of disordered regions in the carbon fibers. The blue shift observed in the G band is most likely related to the unresolved overlapping with the  $D_2$  band (1610  $\text{cm}^{-1}$ ). The  $D_1$  band corresponds to an in-plane transverse optical (TO) mode (Raman inactive mode), which appears when defects are present in the graphitic plane and is usually considered as a measure of the graphitization degree through the intensity ratio  $I_D/I_G$  or the area ratio  $A_D/A_G$ . Two other modes at about 1180 and 1530  $\text{cm}^{-1}$ , the so-called  $D_4$  and  $D_3$  bands, are normally associated with amorphous regions and out-of-plane vibrations due to heteroatoms grafted on graphite units.<sup>12</sup> The analysis revealed the effect of fluorine doping on the degree of graphitization. A significant increase in the area ratio  $A_D/A_G$  from 3.11 to 3.54 has been reported earlier to be due to the creation of defective sites in the  $\text{sp}^2$  carbon plane following HF treatment.<sup>13</sup> Additionally, an increase in the intensity of the  $D_3$  band ( $A_{D_3}/A_G$  increase from 1.81 to 2.66) is associated with the incorporation of out-of-plane  $\text{CF}_2$  groups.<sup>14</sup> In contrast, no significant disorder was observed upon grafting of the pyridine ligand onto FCC ( $A_D/A_G$  decrease from 3.54 to 3.53), since out-of-plane surface functionalities do not increase the intensity of the D bands.<sup>15</sup> Unlike fluorination, the pyridine modification procedure was carried out in a reductive environment. Thus, the defect density in the crystalline regions of the carbon fibers most likely remained unchanged. After the Ru catalyst anchoring process, a new but weak band at about 450  $\text{cm}^{-1}$  appeared that was assigned to Ru-O and Ru-N bonds present in the molecular catalyst, which presents further evidence of the successful immobilization of the Ru catalyst.

## Thermogravimetric study

The results of the thermogravimetric analysis are shown in Figure 2e and S14. Fluorine-doped carbon cloth shows similar behavior as the untreated carbon cloth in the temperature range of 150-500°C with a partial weight loss (of ~ 2%), which can be attributed to the removal of physisorbed water, and carboxyl and hydroxyl groups.<sup>16-17</sup> For temperatures above 500°C, a single peak is present for CC and FCC in the differential thermal analysis (DTA) (Figure S13), centered at 559 and 591°C respectively, indicating a complete degradation of the carbon structure due to thermal oxidation. The increase in degradation temperature of the FCC can be attributed to the introduction of C-F bonds onto the surface of the fibres, which makes the available carbon sites more resilient to oxidation.<sup>18</sup>

Upon grafting of the  $-\text{CH}_2-\text{CH}_2$ -pyridine units onto the surface of the carbon fibers, a two-stage degradation is observed with a partial weight loss of 5.74% in the temperature range of 200-400°C, which is attributed to thermal desorption of the ligand

(pyridine-carbon chain).<sup>19</sup> No noticeable change in the complete degradation temperature is observed with respect to FCC, indicating that the new surface functional groups grafted do not weaken the C-F bonds that are responsible for the oxidative resistance of the electrode.

Thermogravimetric analysis shows a clear difference between PFCC and RuPFCC (Figure 2e). Immobilization of the Ru catalyst, causes an increase in weight loss in the temperature range from 200-400°C. As shown in the inset in Figure 2e, the weight loss corresponds to 8.95% for RuPFCC. The difference in the weight loss observed in the thermogravimetric analysis, compared to the loading mass obtained after each preparation procedure is most likely related to the hydrogen-bonded water molecules attached to the catalyst.

### **Electrochemical Characterization and reactivity study**

The electrochemical setup consists of a platinum wire as the counter electrode, Ag/AgCl (3.0 M KCl) as the reference electrode, and the carbon cloth samples as the working electrode. The solution employed was 0.1 M of phosphate buffer solution (pH 7). Prior to each measurement, the samples were immersed until stable potential was reached. Cyclic voltammetry behavior of the electrodes was tested in a wide potential scale (+2.25 V to -1.0 V vs RHE) and the operating potential for the bulk electrolysis (controlled potential electrolysis) experiments for water oxidation were selected. Electrochemical Impedance Spectroscopy (EIS) was performed in potentiostatic mode at open circuit potential (bias potential) within a frequency range from 100 kHz to 10 mHz with a perturbation of 10 mV rms.

### **Chronopotentiometric experiments and gas detection**

CPE experiments were conducted to confirm the oxidation of water, and reduction of protons. These experiments also allow evaluating the stability of the anchored catalyst. For oxygen evolution a constant current of 2.6 mA/cm<sup>2</sup> and for hydrogen production, a constant current of -5 mA/cm<sup>2</sup> was applied over 120 min to a RuPFCC working electrode (1cm x 1cm). The experiments were performed in a 0.1M Phosphate Buffer Solution pH 7, with a carbon counter electrode and Ag/AgCl as reference electrode. The dissolved gas was detected in a closed system using an O<sub>2</sub> and H<sub>2</sub> measurement system (Unisense) comprising a needle sensor of 2.1 x 80mm connected to an O<sub>2</sub> and H<sub>2</sub> UniAmp units. Prior to starting the experiment, the system was purged with N<sub>2</sub> for 30 min.

**Electrode regeneration of the electrode (ERE).** After oxidation processes (long CPE experiments), the electrochemical behavior of the electrodes was checked under nitrogen. In almost all the cases slight increase in the overpotential and decrease in the WO current were observed. Envisioning that the oxidative stress of the continuous positive potential onto the electrode can be a reason, electrodes were reduced for 2h/4h duration (depending on the time of oxidation) under CPE condition. The potentials for CPE experiments were chosen from the electrochemical

behavior of the electrodes after oxidation experiments. The chosen value of the fixed potential for the regeneration (reduction) experiments were the potentials where it started proton reduction behavior. Upon reduction, regeneration of electrocatalytic WO activity was found to be up to ~98% after 48 h use and of ~70% after 16 days.

### Calculation of turnovers (TO).

For **water oxidation**,  $TO_{WO}$  = number of moles of water oxidized/(mole of catalyst)

$TO_{WO}$  is calculated from the charge vs time plot of the CPE experiments.

At the WO potentials, e.g., at +1.71 V (for 8 h) and 1.81 V (for 48 h) (vs RHE) charge transfer of 7.2 coulombs and 30.6 coulombs were seen respectively. (1 mA.h = 3.6 coulomb)

96500 coulomb = 1 mole of electrons

7.2 coulomb =  $7.46 \times 10^{-5}$  mole of electrons  $\equiv$  oxidation of  $3.73 \times 10^{-5}$  mole of water (transfer of 4 electrons is needed to oxidize 2 water molecules)

30.6 coulomb =  $3.17 \times 10^{-4}$  mole of electrons  $\equiv$  oxidation of  $1.59 \times 10^{-4}$  mole of water

To minimize the error of calculating the catalyst amount on PFCC, the same procedure was repeated ten times and an average was taken into consideration. A total amount of 2.1 mg of catalysts lost from the stock solution was observed after anchoring **1** onto ten batches of 3 cm x 3 cm PFCC electrode. Each PFCC contains approximately 0.21 mg of **1**.

i.e. a 1 cm x 0.5 cm electrode (used for CPE) contains  $(0.21 \times 0.5) / 9 \text{ mg} = 0.0116 \text{ mg} = 2.14 \times 10^{-8}$  mole (MW of  $1 + H_2O$  is 545.03) of **1**

$TO_{WO}$  over 8 h at 1.71 V (vs RHE) is  $(3.73 \times 10^{-5}) / (2.14 \times 10^{-8}) = 1742.9$  and >95% recovery of the electrocatalytic activity was possible after regeneration process.

$TO_{WO}$  over 48 h at 1.81 V (vs RHE) is  $(1.59 \times 10^{-4}) / (2.14 \times 10^{-8}) = 7429.9$  and >90% recovery of the electrocatalytic activity was possible after regeneration process.

For **proton reduction**,  $TO_{PR}$  = number of moles of water reduced/(mole of catalyst)

$TO_{PR}$  is calculated from the charge vs time plot of the CPE experiments.

At the PR potentials, e.g., at -0.79 V (for 3 h) (vs RHE) charge transfer of 7.6 coulomb was observed. (1 mA.h = 3.6 coulomb)

96500 coulomb = 1 mole of electrons

7.2 coulomb =  $7.88 \times 10^{-5}$  mole of electrons  $\equiv$  reduction of  $7.88 \times 10^{-5}$  mole of protons

1 cm x 0.5 cm electrode (used for CPE) contains  $2.14 \times 10^{-8}$  mole (see above; MW of  $1 + H_2O$  is 545.03) of **1**.

$TO_{PR}$  over 3 h at -0.79 V (vs RHE) is  $(7.88 \times 10^{-5}) / (2.14 \times 10^{-8}) = 3682.2$

**Calculation of the weight percentage of ruthenium on RuPFCC.** According to our investigations (see above), 0.21 mg of 1  $[\text{Ru}^{\text{II}}(\text{mcbp})(\text{H}_2\text{O})_2]$  was used for the preparation of a RuPFCC electrode with a 3 cm x 3 cm diameter. Since the catalyst was anchored as  $[\text{Ru}^{\text{II}}(\text{mcbp})(\text{H}_2\text{O})]$  (after replacing one  $\text{H}_2\text{O}$  unit), 0.203 mg  $[\text{Ru}^{\text{II}}(\text{mcbp})(\text{H}_2\text{O})_2]$  should be considered for the quantitative analysis. In  $[\text{Ru}^{\text{II}}(\text{mcbp})(\text{H}_2\text{O})]$  the weight percentage of ruthenium is  $(101.9/545.03) \times 100\% = 18.69\%$ , i.e., in 0.203 mg of  $[\text{Ru}^{\text{II}}(\text{mcbp})(\text{H}_2\text{O})]$  the quantity of ruthenium is 0.038 mg. The total weight of the 3 cm x 3 cm diameter of RuPFCC electrode was 101.4 mg. Thus, the weight percentage of ruthenium on the RuPFCC electrode is  $(0.038/101.4) \times 100\% = 0.037\%$

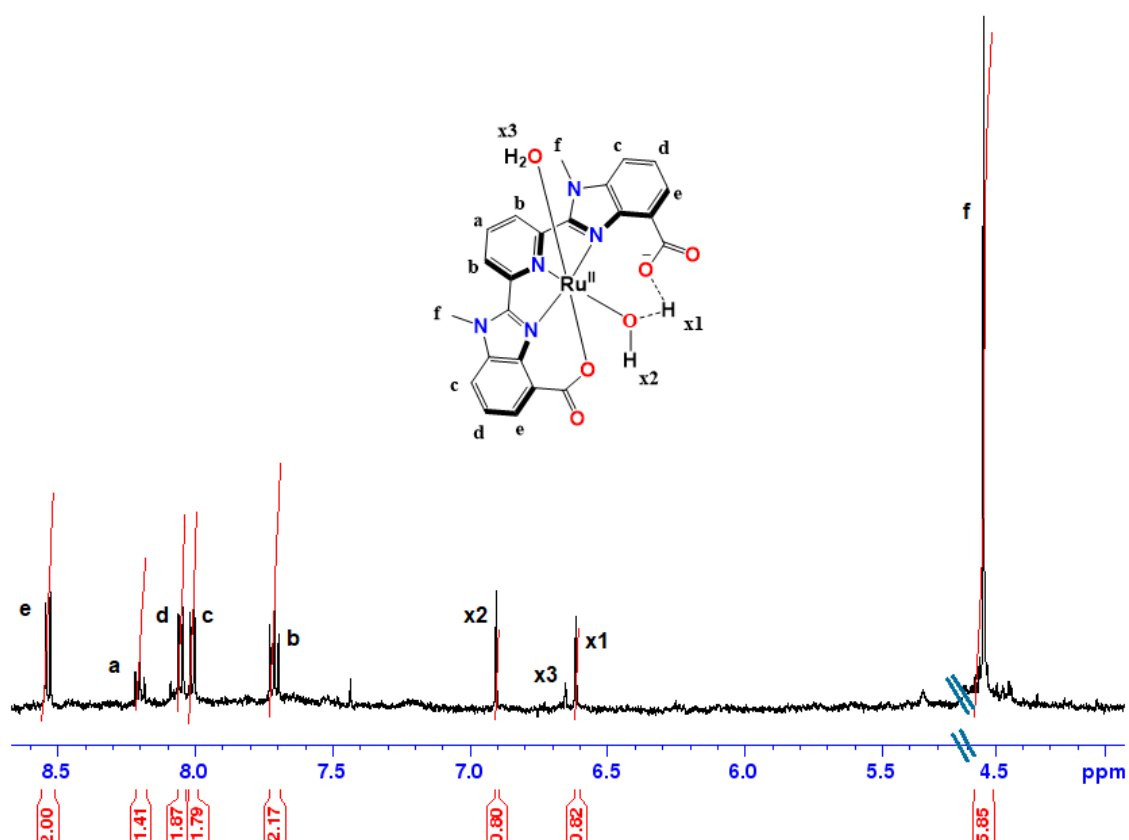

**Figure S1.** 500 MHz,  $^1\text{H}$  NMR (4.0-8.6 ppm) of **1** in  $\text{CD}_3\text{OD}$  at 298 K. Inset shows chemical structure of **1**. Broad singlet signal of non-coordinated water at 4.87 ppm is deleted for clarity.

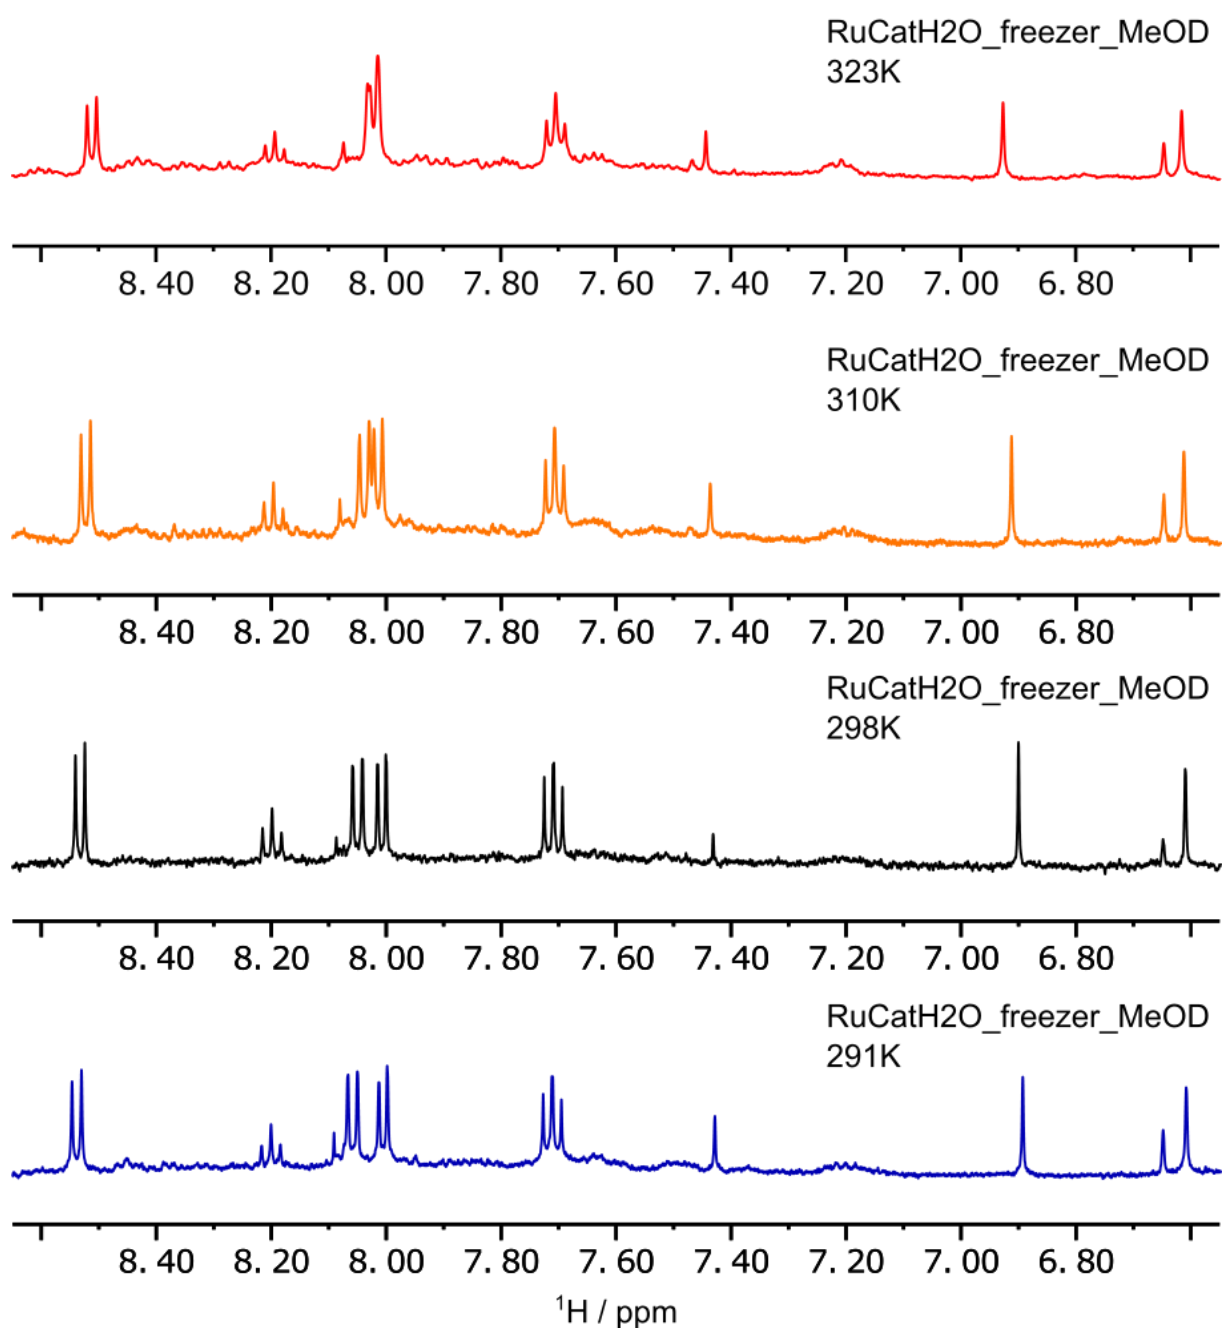

**Figure S2.** 500 MHz, temperature dependent (291 K-232 K)  $^1\text{H}$  NMR (6.6-8.6 ppm) of **1** in  $\text{CD}_3\text{OD}$ .

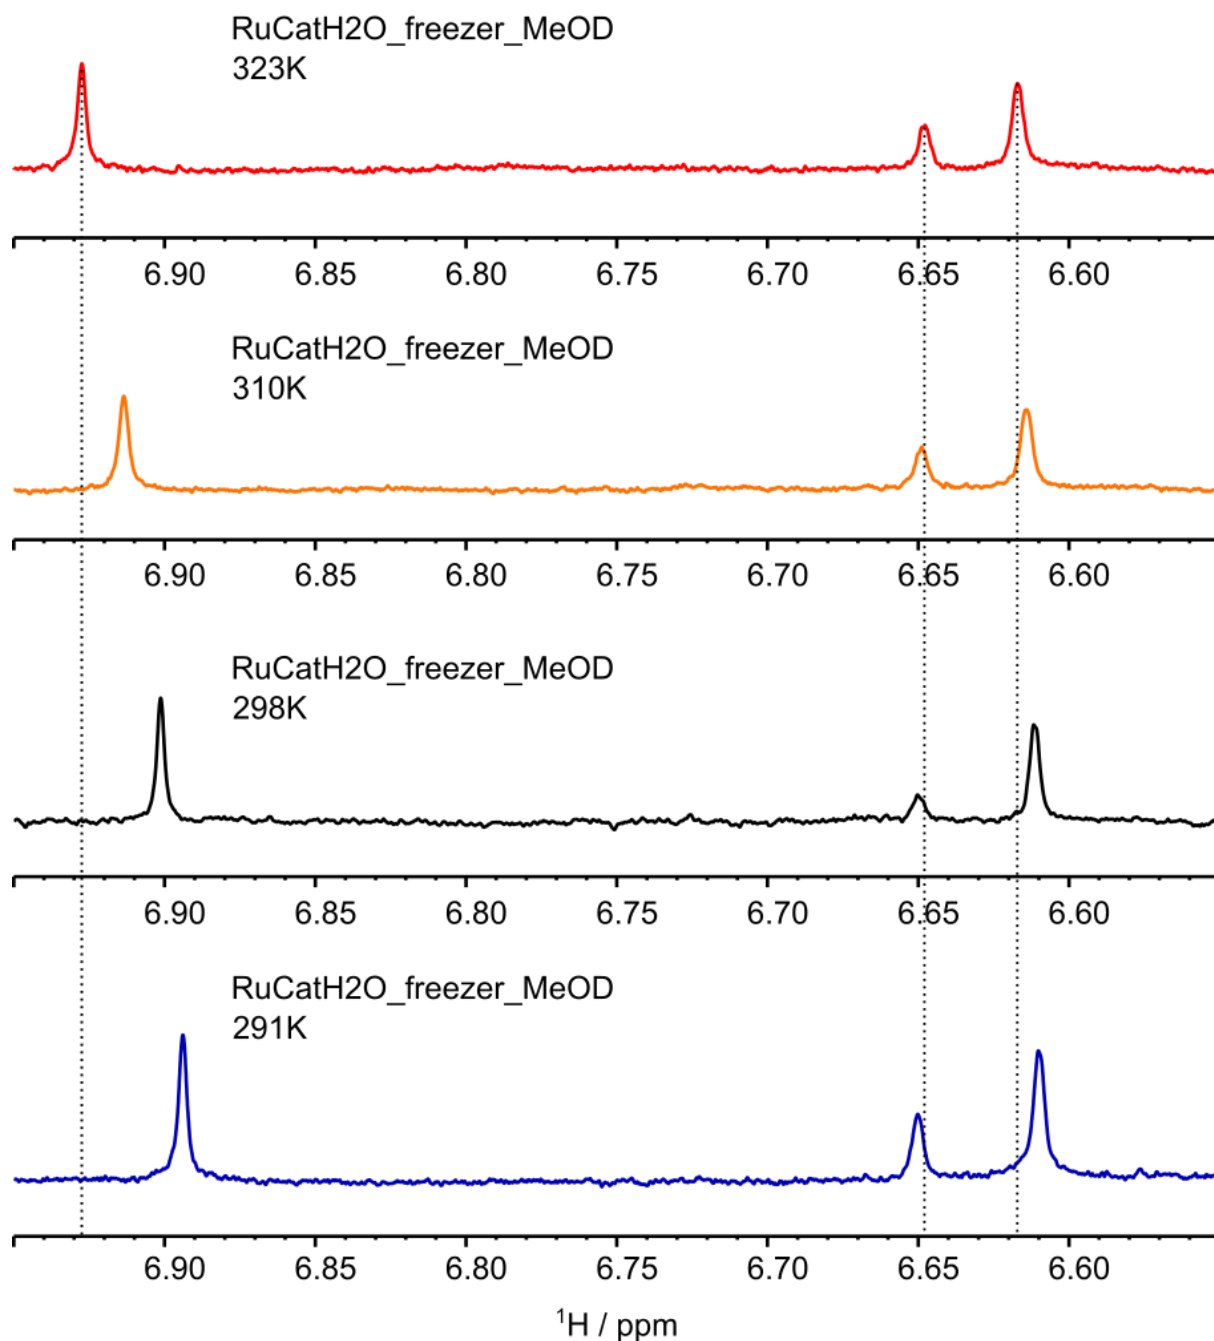

**Figure S3.** Magnified 500 MHz, temperature dependent (291 K-323 K)  $^1\text{H}$  NMR (6.55-6.95 ppm) of **1** in  $\text{CD}_3\text{OD}$ , showing clear difference in temperature dependence depending on whether the proton is H-bonded or free.

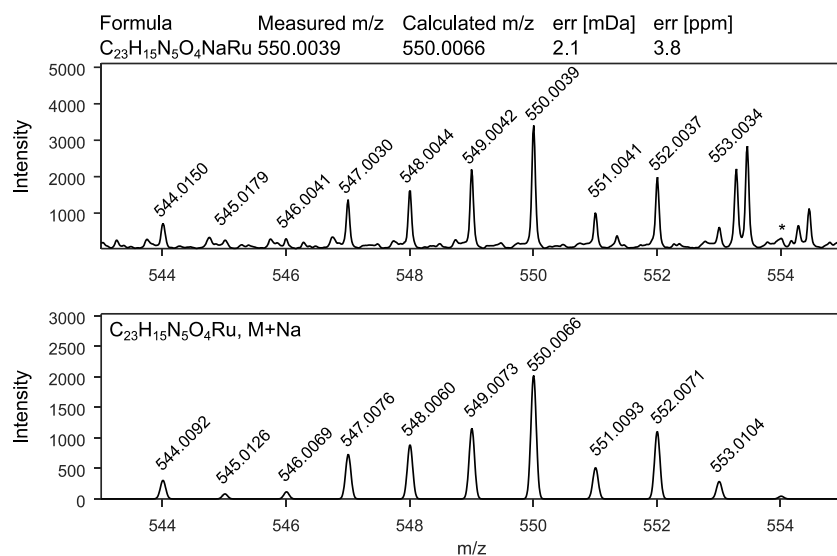

**Figure S4.** Experimental isotope pattern of the major singly charged species at 550.0039 from an HRMS experiment of a methanol solution of **1** and corresponding calculated isotope pattern of the molecular formula  $C_{23}H_{15}N_5O_4RuNa$  ( $1+Na^+$ ) at 550.0066. An asterisk signifies a peak obscured by overlapping signals.

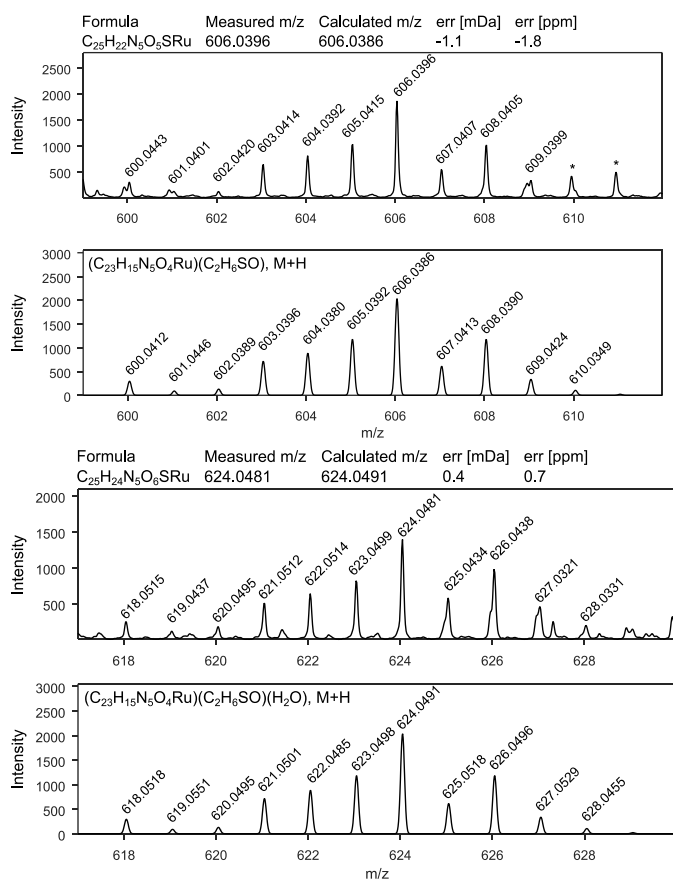

**Figure S5.** Experimental isotope pattern of two singly charged species at 606.0396 and 624.0481 from an HRMS experiment of a methanol:H<sub>2</sub>O:DMSO solution of **1** and corresponding calculated isotope patterns of the molecular formulas C<sub>25</sub>H<sub>21</sub>N<sub>5</sub>O<sub>5</sub>SRuH (**1**+DMSO+H<sup>+</sup>) at 606.0386 and C<sub>25</sub>H<sub>23</sub>N<sub>5</sub>O<sub>6</sub>SRuH (**1**+DMSO+H<sub>2</sub>O+H<sup>+</sup>) at 624.0491. The easily detectable DMSO and water coordination points towards the vacant site available on the ruthenium center in **1**, that is essential for catalyst anchoring and catalysis. An asterisk signifies a peak obscured by overlapping signals.

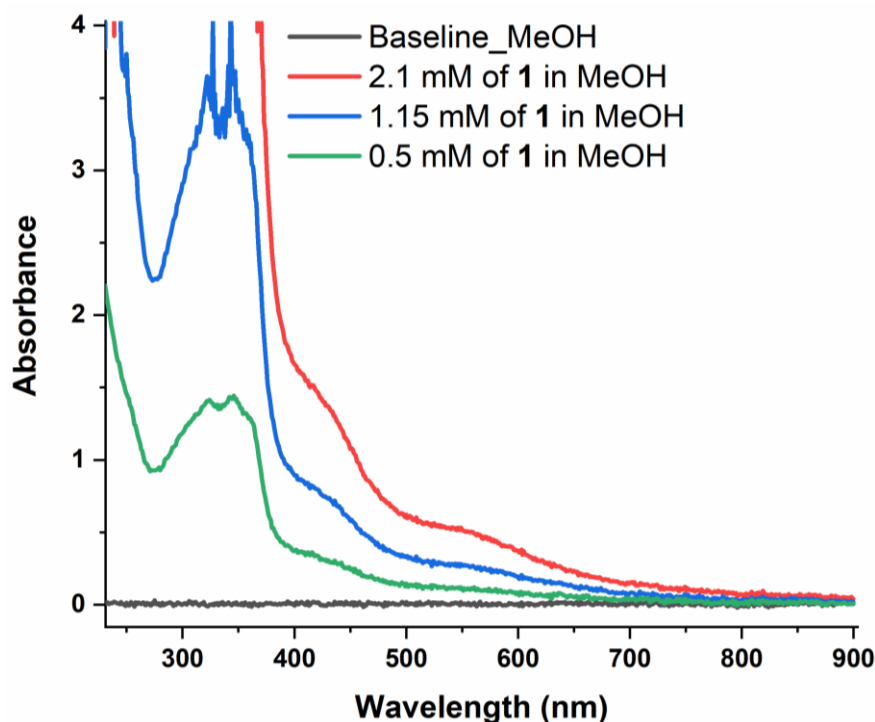

**Figure S6.** UV-Vis spectra (240–900 nm) of a methanol solution of **1** in different concentrations (0.5 mM – 2.1 mM).

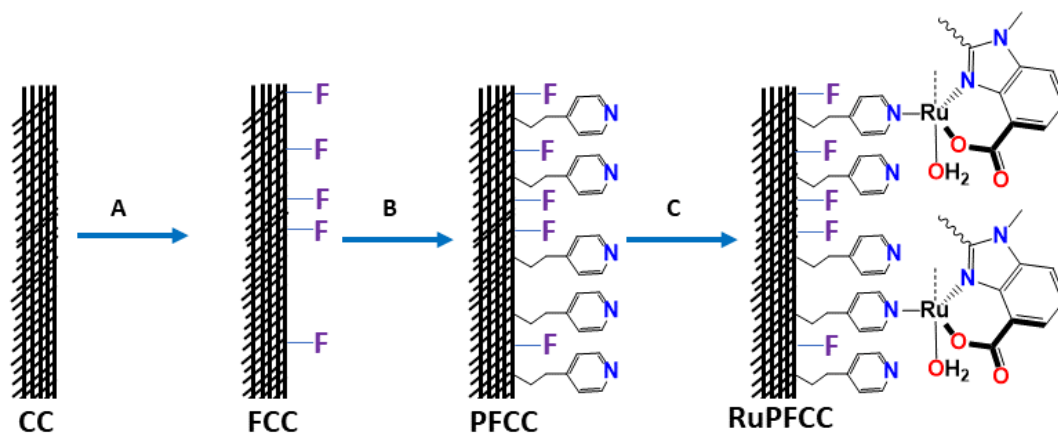

**Figure S7.** Schematic representation of the stepwise preparation of RuPFCC. Detail procedure is discussed in the experimental section. A is 20% HF, B is a combination of 4-(2-aminoethyl) pyridine, HBF<sub>4</sub>, CH<sub>3</sub>COOH and isoamyl nitrite, C is **1** in MeOH:H<sub>2</sub>O (1:1).

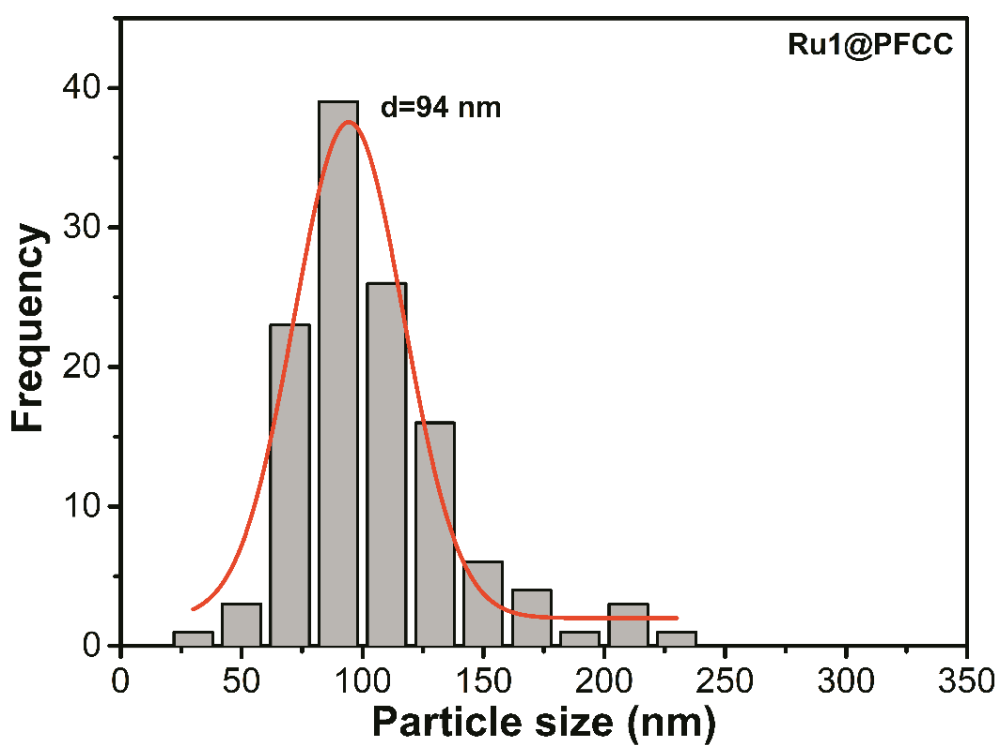

**Figure S8.** Agglomeration size histogram calculated from SEM images

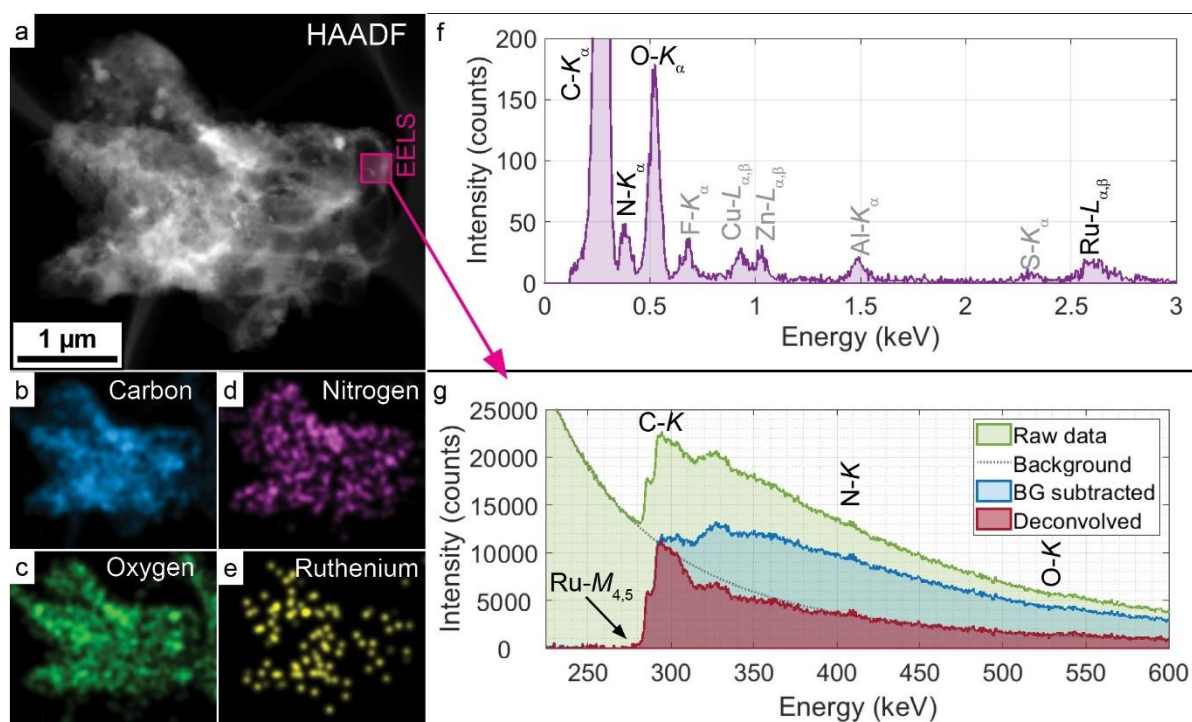

**Figure S9.** Results of the TEM investigation. In (a), a Z-contrast scan of a collection of aggregate is presented. EDX maps from this region are presented in false color for Carbon (b), Oxygen (c), Nitrogen (d), and Ruthenium (e). In (f), the integrated EDX spectrum from the entire field of view is presented along with peak labels. Grey peaks were identified as impurities. In (g), an EELS spectrum from the boxed region in (a) is presented. Pre-edge background and plural scattering contributions are removed in the red spectrum presented in the foreground.

**Table S1** – EDX quantification results from the spectrum presented in **Figure S12f**

| Element | Quantification edge family | Atomic Fraction (%) | Mass Fraction (%) |
|---------|----------------------------|---------------------|-------------------|
| C       | K                          | 88.63 ± 3.20        | 82.44 ± 1.85      |
| N       | K                          | 2.73 ± 0.56         | 2.96 ± 0.60       |
| O       | K                          | 8.05 ± 1.64         | 9.98 ± 2.01       |
| Ru      | K                          | 0.59 ± 0.10         | 4.62 ± 0.78       |

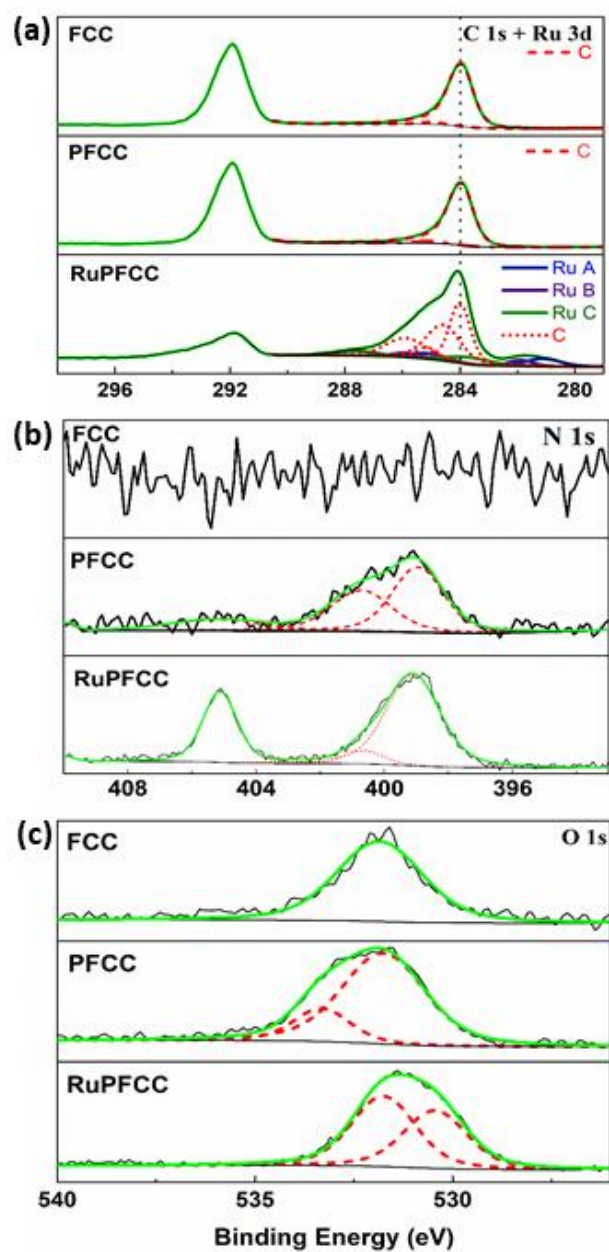

**Figure S10.** High-resolution XPS spectra of (a) C 1s + Ru 3d , (b) N 1s and (c) O 1s. Sample 1, Sample 2 and sample 3 represents FCC, PFCC and RuPFCC respectively.

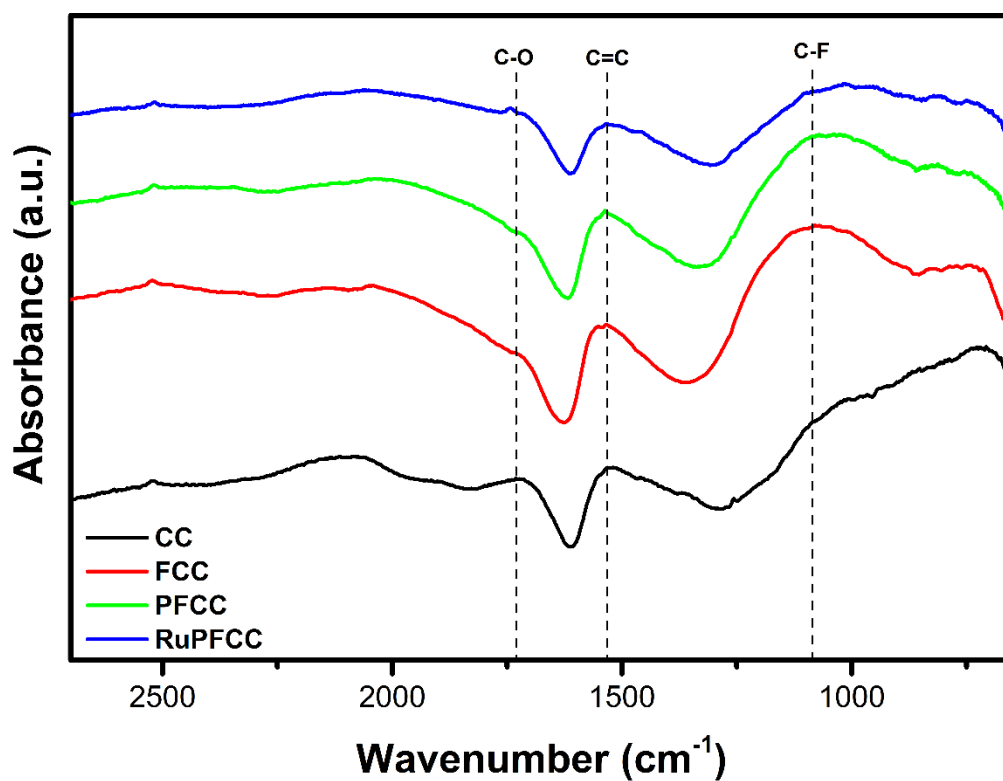

**Figure S11.** FTIR spectra of pristine activated carbon cloth (CC), fluorinated (FCC), pyridine modified (PFCC) and Ru catalyst anchored (RuPFCC) carbon cloth.

**Table S2.** Deconvolution parameter of Raman spectra for CC, FCC, PFCC and RuPFCC samples.

| Sample     | D <sub>4</sub> |             | D <sub>1</sub> |            | D <sub>3</sub> |              | G+D <sub>2</sub> |            | A <sub>D</sub> /A <sub>G</sub> |
|------------|----------------|-------------|----------------|------------|----------------|--------------|------------------|------------|--------------------------------|
|            | Position       | FWHM        | Position       | FWHM       | Position       | FWHM         | Position         | FWHM       |                                |
| CC         | 1185.1 ± 6.3   | 85.3 ± 15.3 | 1324.5 ± 1.1   | 67.4 ± 1.3 | 1518.8 ± 5.8   | 97.6 ± 8.7   | 1599.2 ± 0.3     | 28.4 ± 1.2 | 3.15                           |
| FCC        | 1186.6 ± 12.8  | 99.7 ± 15.1 | 1327.8 ± 2.5   | 68.9 ± 4.3 | 1526.8 ± 8.7   | 111.5 ± 22.5 | 1597.1 ± 2.0     | 28.3 ± 1.1 | 3.54                           |
| PFCC       | 1180.2 ± 9.2   | 94.1 ± 11.6 | 1327.8 ± 1.5   | 71.2 ± 2.6 | 1528.8 ± 10.2  | 96.9 ± 11.9  | 1599.3 ± 1.1     | 27.8 ± 0.9 | 3.53                           |
| RuPFC<br>C | 1178.2 ± 3.1   | 90.4 ± 15.5 | 1329.9 ± 1.5   | 73.6 ± 1.7 | 1531.3 ± 5.9   | 95.7 ± 7.2   | 1601.7 ± 0.6     | 28.1 ± 1.2 | 3.79                           |

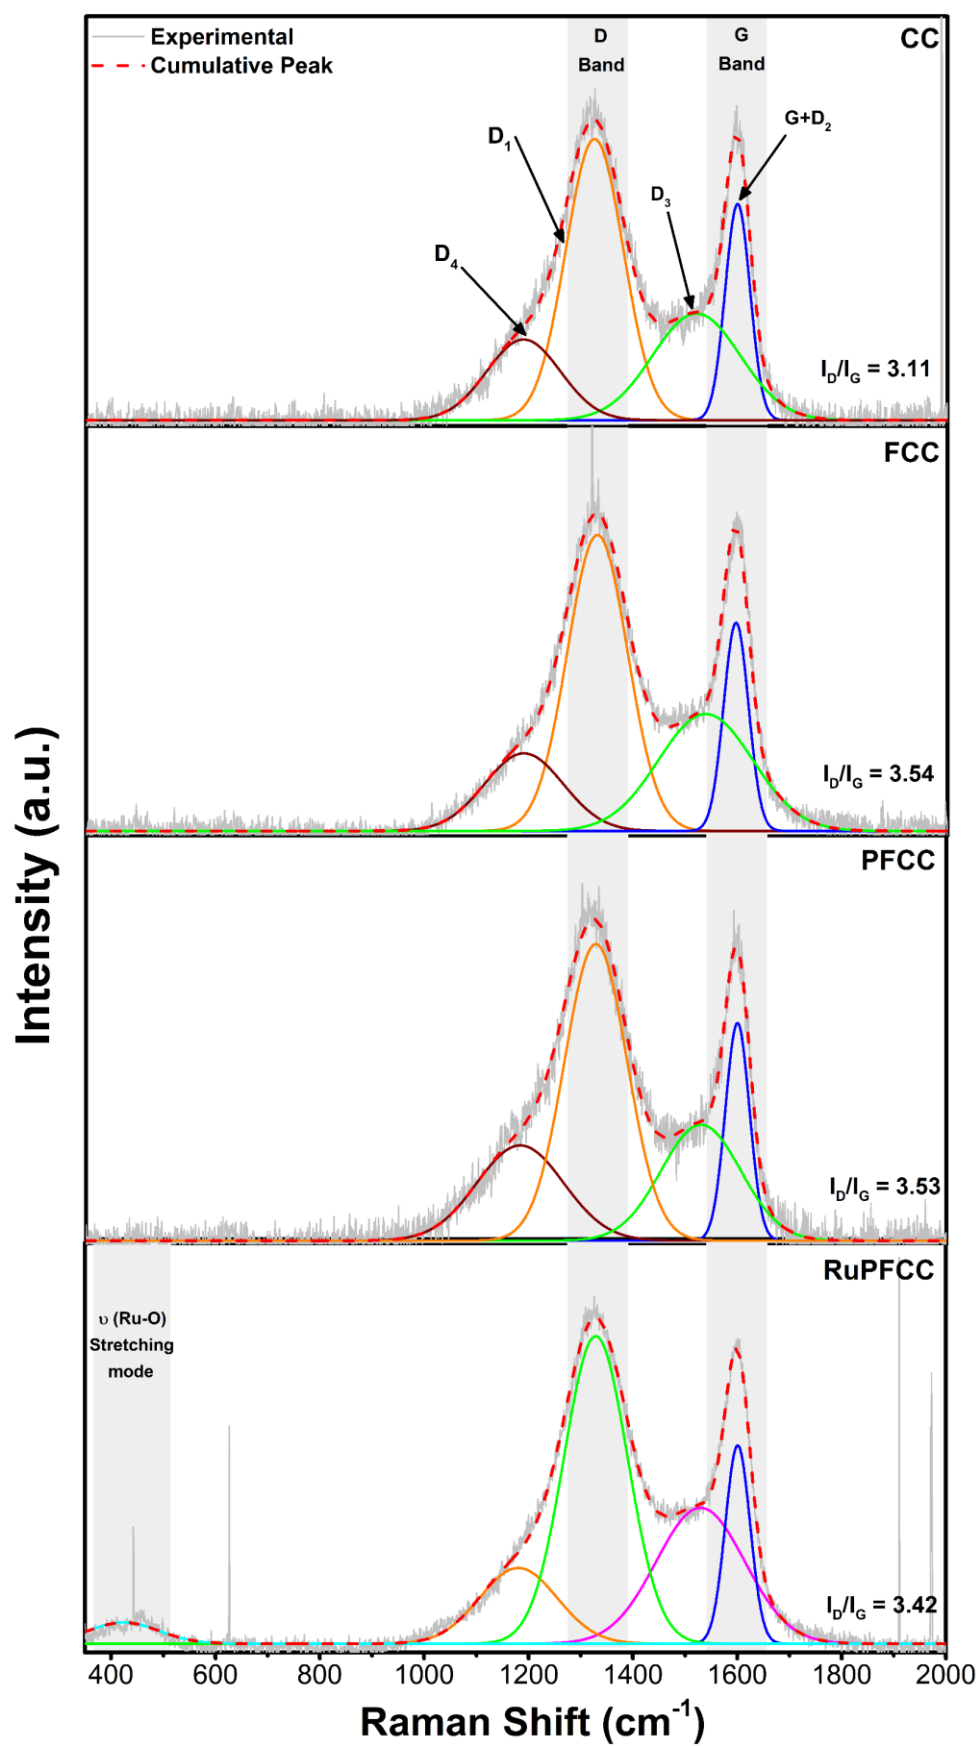

**Figure S12.** Deconvolution of Raman spectra of pristine activated carbon cloth (CC), fluorinated (FCC), pyridine modified (PFCC) and Ru catalyst anchored (Ru PFCC)

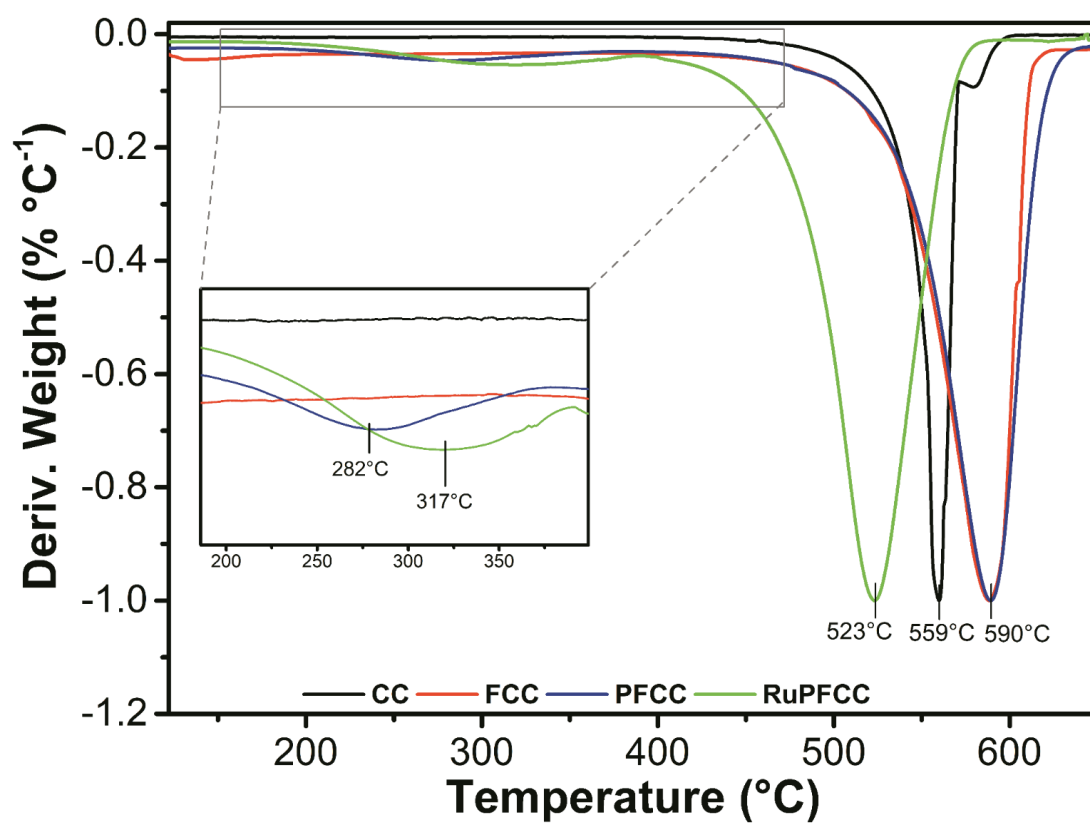

**Figure S13.** Differential Thermal Analysis under air flow for untreated and treated carbon cloth.

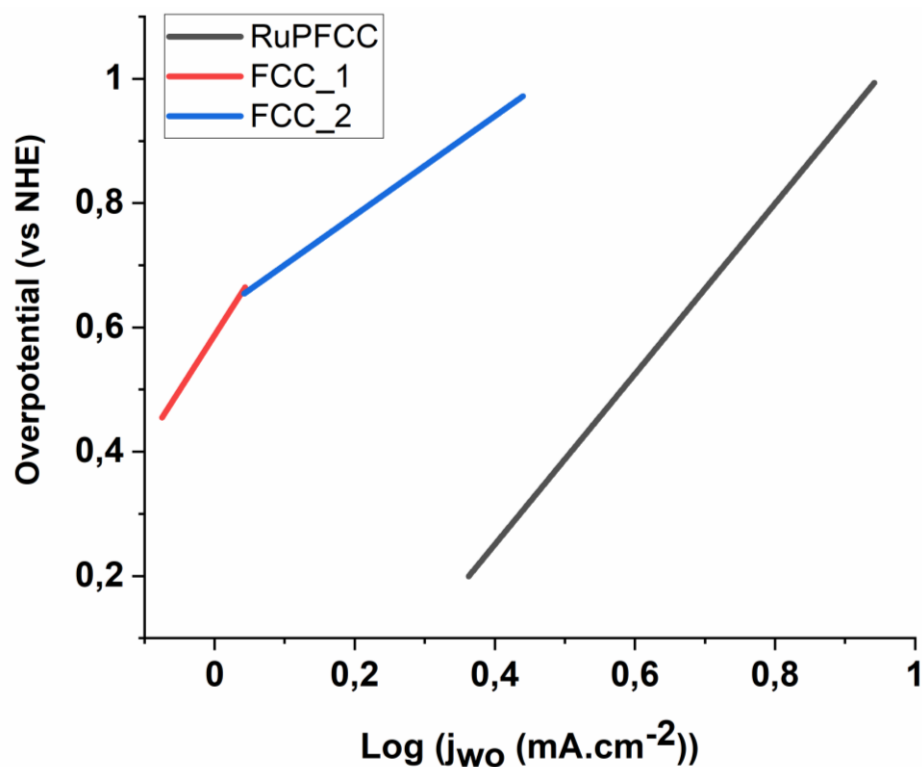

**Figure S14.** Tafel plots for the O<sub>2</sub> partial current density of two different electrodes. RuPFCC starts oxidizing water with 215 mV overpotential and shows a constant slope for the overpotential range of 0.21 V to 0.97 V. FCC\_1 represents tafel slope for the overpotential range of 0.45V to 0.67V, whereas FCC\_2 represents corresponding value in the overpotential range of 0.65V to 0.97 V.

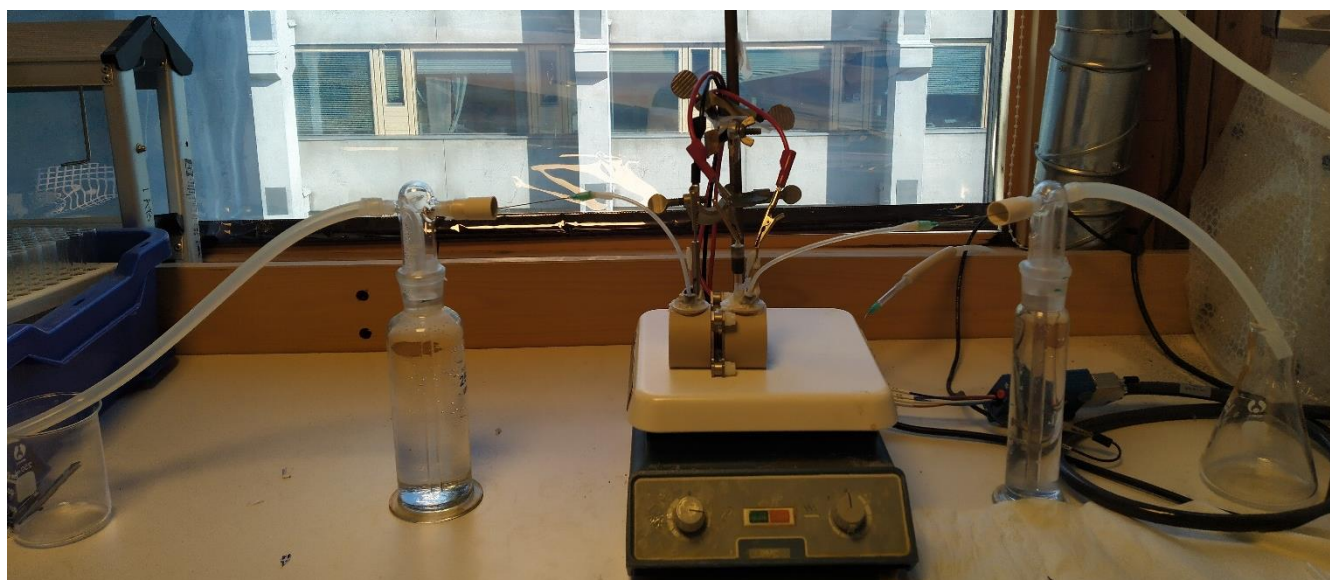

**Figure S15.** A graphic illustration of the home-made electrolysis set-up for the overall water electrolysis at pH 7 and quantitative gas detections from the anode ( $\text{O}_2$ ) and cathode ( $\text{H}_2$ ) compartments using an H-cell (purchased from redox.me). The anode and cathode compartments were separated by a Nafion-117 membrane.

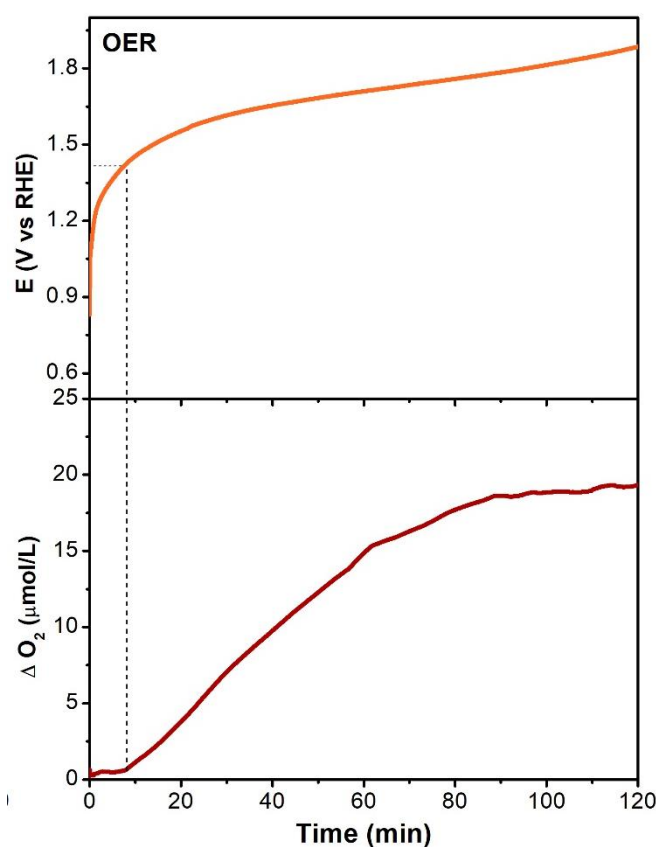

**Figure S16.** Dissolved oxygen detection experiment (in pH 7 phosphate buffer) at a constant current density  $2.6 \text{ mA}\cdot\text{cm}^{-2}$  using RuPFCC (1cm x 1cm) as working electrode, a glassy carbon counter electrode and a Ag/AgCl reference electrode. Oxygen was detected using a microsensor (Unisense) immerse in the electrolyte.

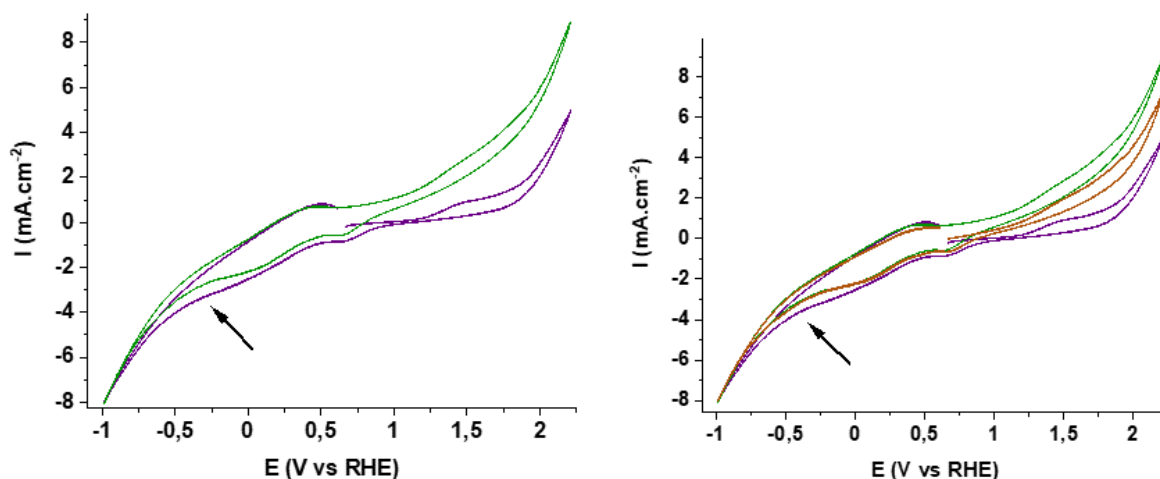

**Figure S17.** CVs ( $-1.1$  V to  $+2.25$  V, vs RHE) of a pH 7 phosphate buffer ( $0.1$  M) solution using  $1\text{ cm} \times 0.5\text{ cm}$  RuPFCC (green trace) as the working electrodes (WE) at scan rate of  $100\text{ mVs}^{-1}$ . Pt wire and Ag/AgCl ( $3.0$  M KCl) electrodes were used as counter electrode and reference electrode respectively, before CPE experiment (green trace), after  $72\text{ h}$  of CPE experiment at  $+1.71\text{ V}$  (purple trace) and after first regeneration experiment for  $2\text{ h}$  (brown trace).

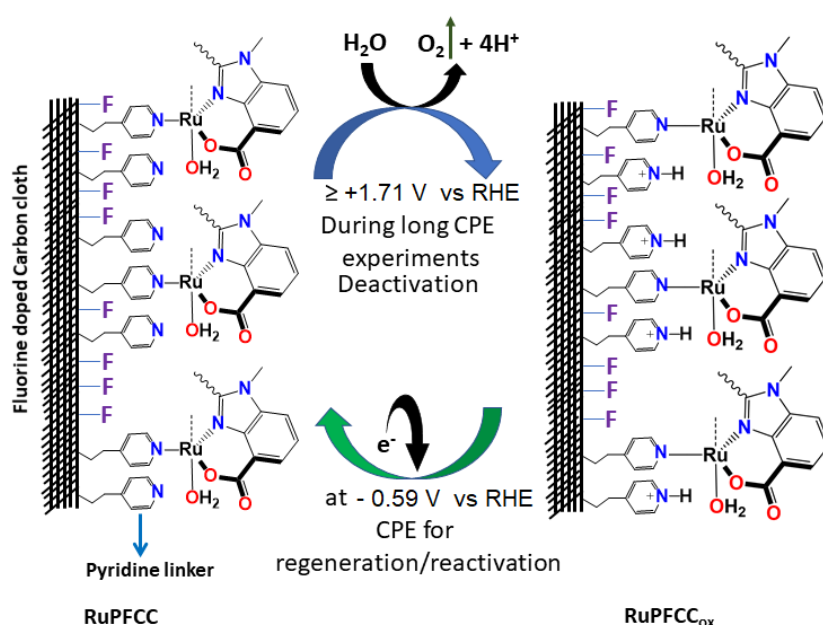

**Figure S18.** Possible deactivation and regeneration mechanism of RuPFCC.

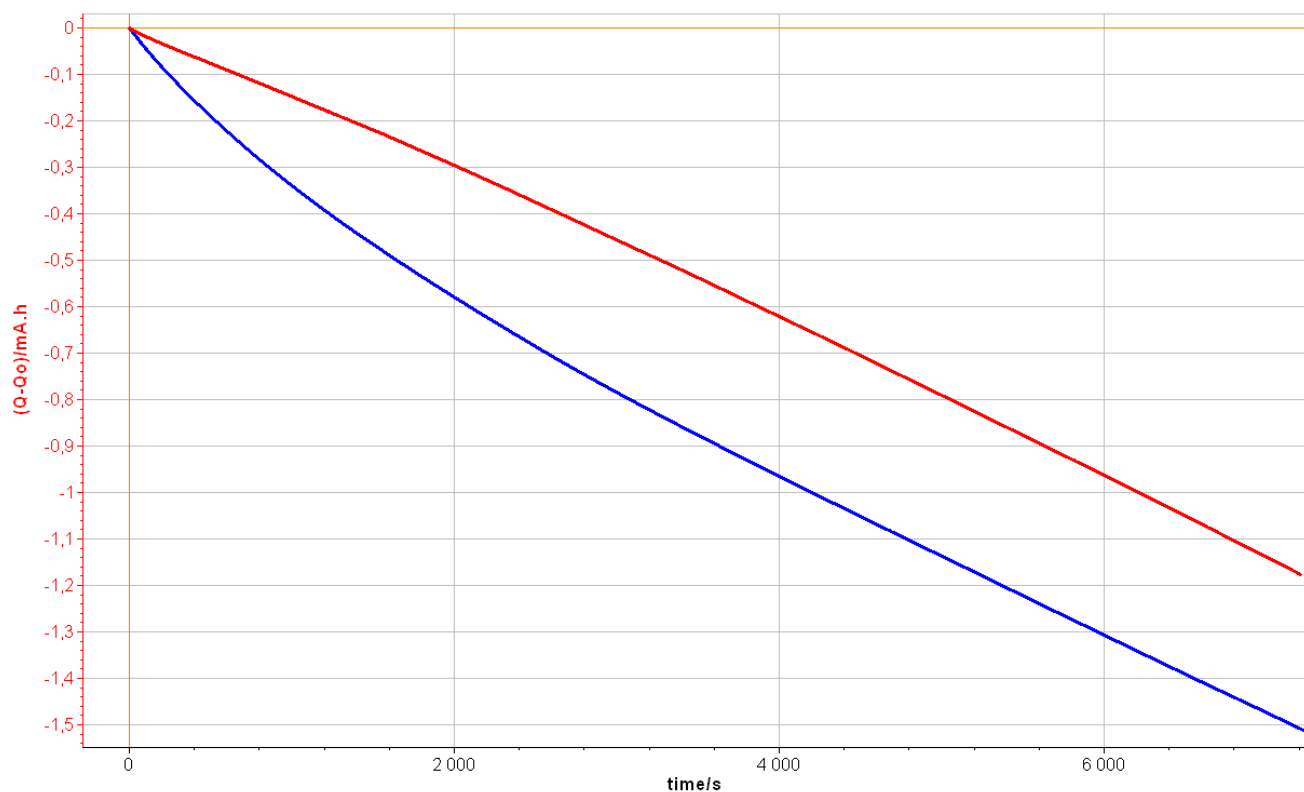

**Figure S19.** Negative charge (Q) vs time (s) plot for CPE over 2 h, at -1.2 V, where blue trace shows the result using 1 cm  $\times$  0.5 cm RuPFCCox as working electrode, and red trace shows the result using 1 cm  $\times$  0.5 cm RuPFCC as working electrode. Carbon paper (1 cm  $\times$  0.5 cm) and Ag/AgCl (3.0 M KCl) electrodes were used as counter electrode and reference electrode respectively.

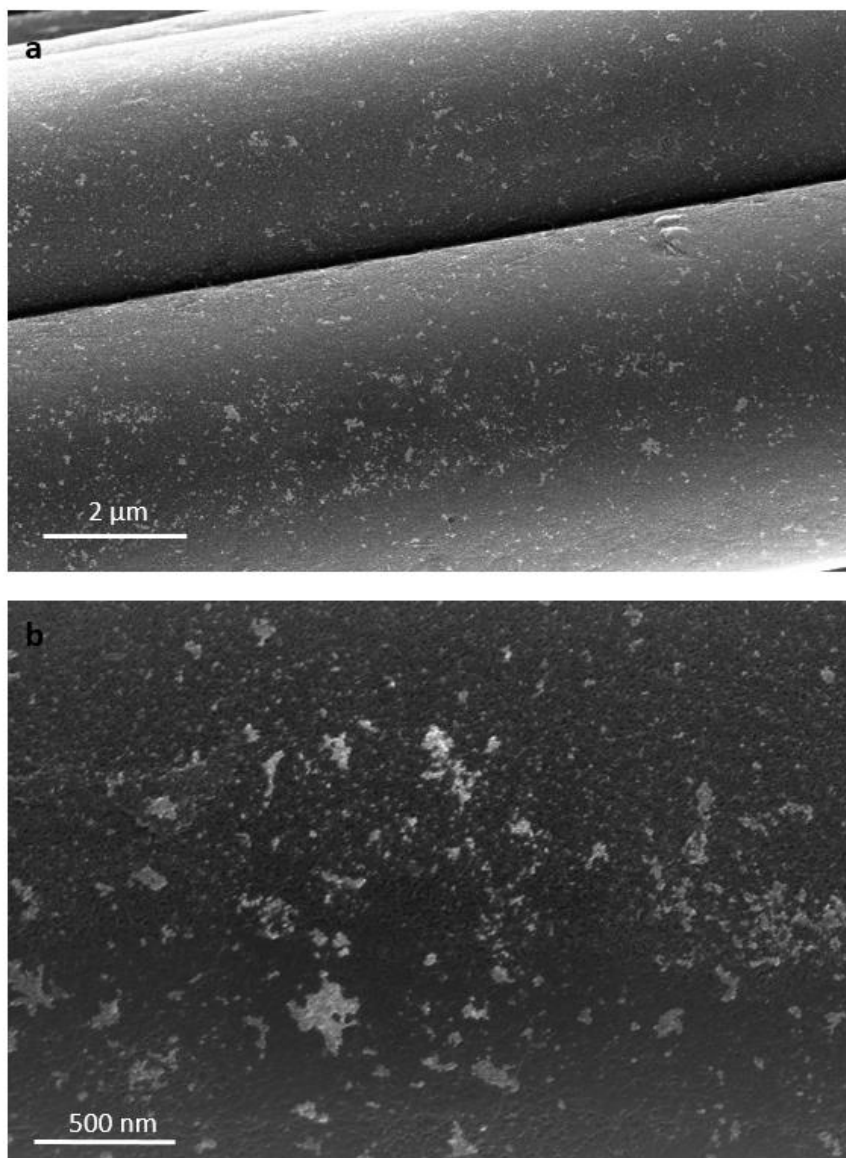

**Figure S20.** SEM images of the RuPFCC electrode after multiple OER and HER tests for 16 days.

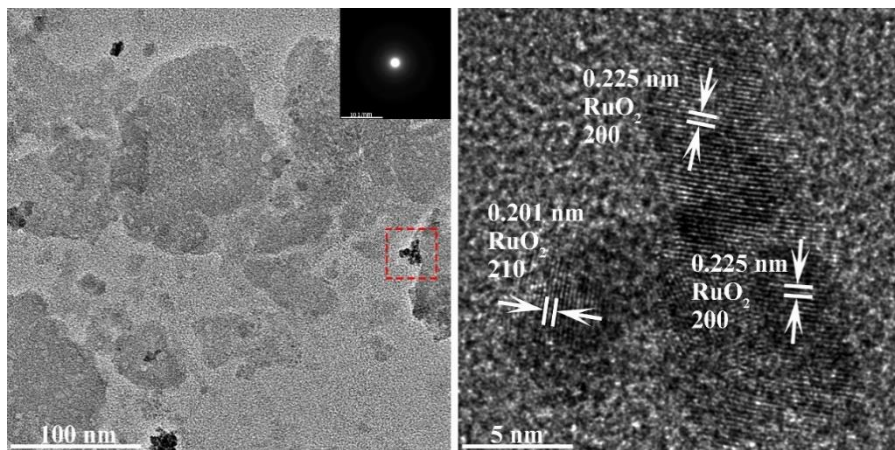

**Figure S21.** TEM image, SAED pattern and HRTEM of area 1 (after 16 days of multiple OER and HER experiments).

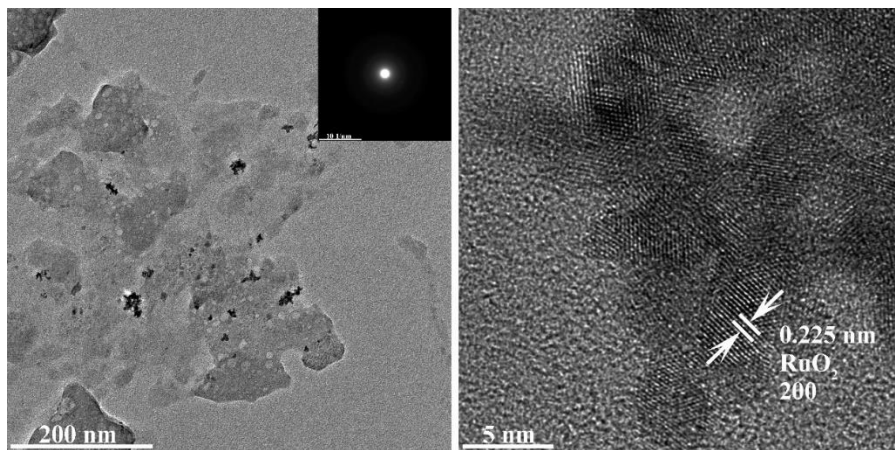

**Figure S22.** TEM image, SAED pattern and HRTEM of area 2 (after 16 days of multiple OER and HER experiments).

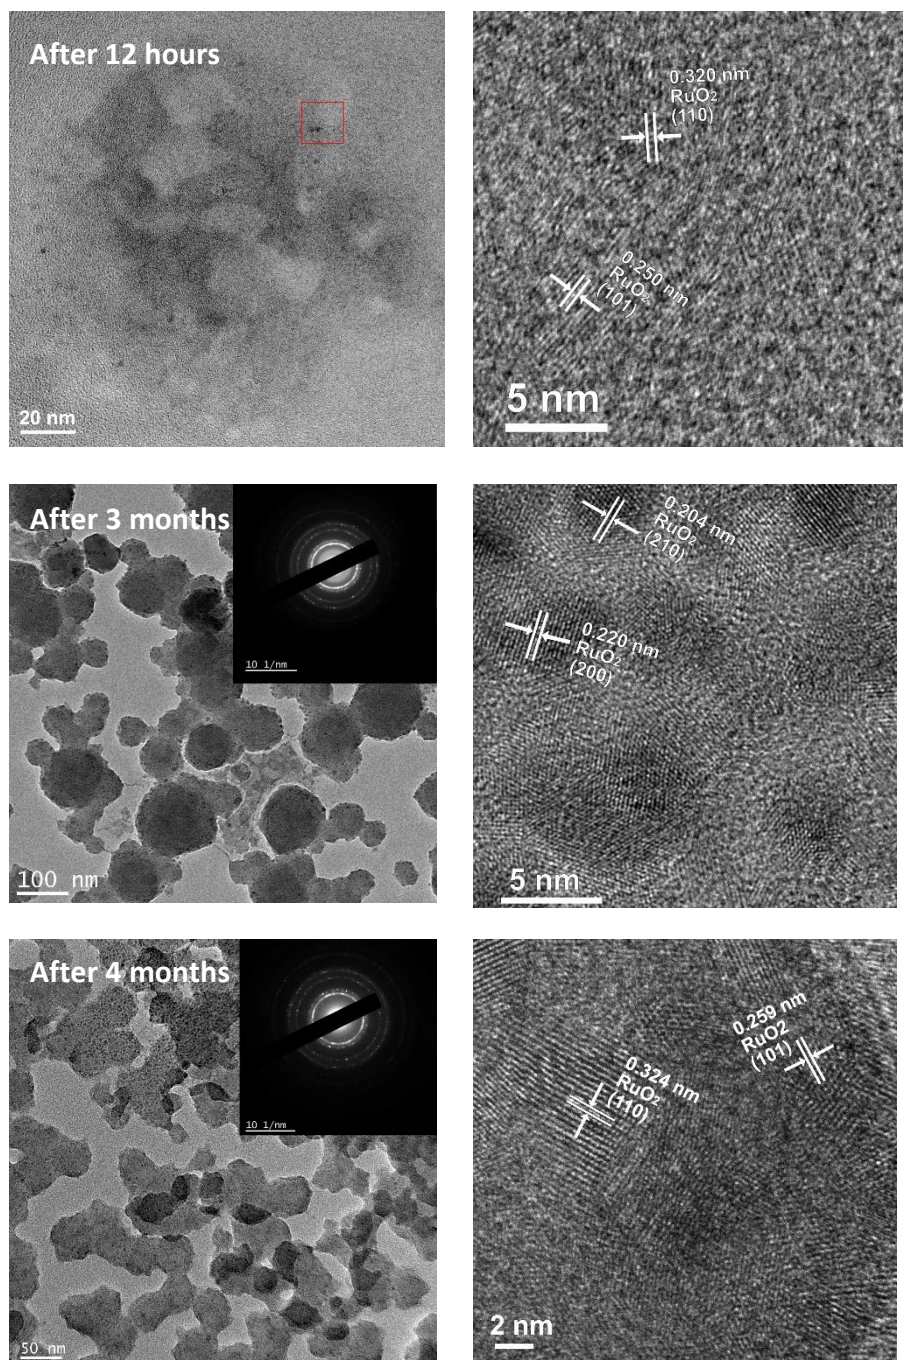

**Figure S23.** TEM observation of catalysts after electrolysis for 12 hours (OER), 3 months (multiple OER and HER experiments), and 4 months (multiple OER and HER experiments). Left are low-magnification and SAED patterns; Right are high-resolution images showing the oxidized product.

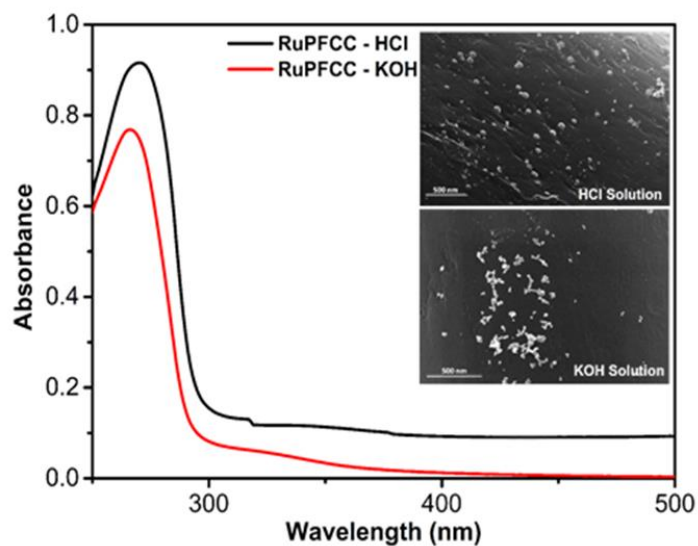

**Figure S24.** UV-Vis spectra of the resulting solution after immersing RuPFCC electrodes (after 16 days) in 1.0 M KOH or in 1.0 M HCl solution overnight.

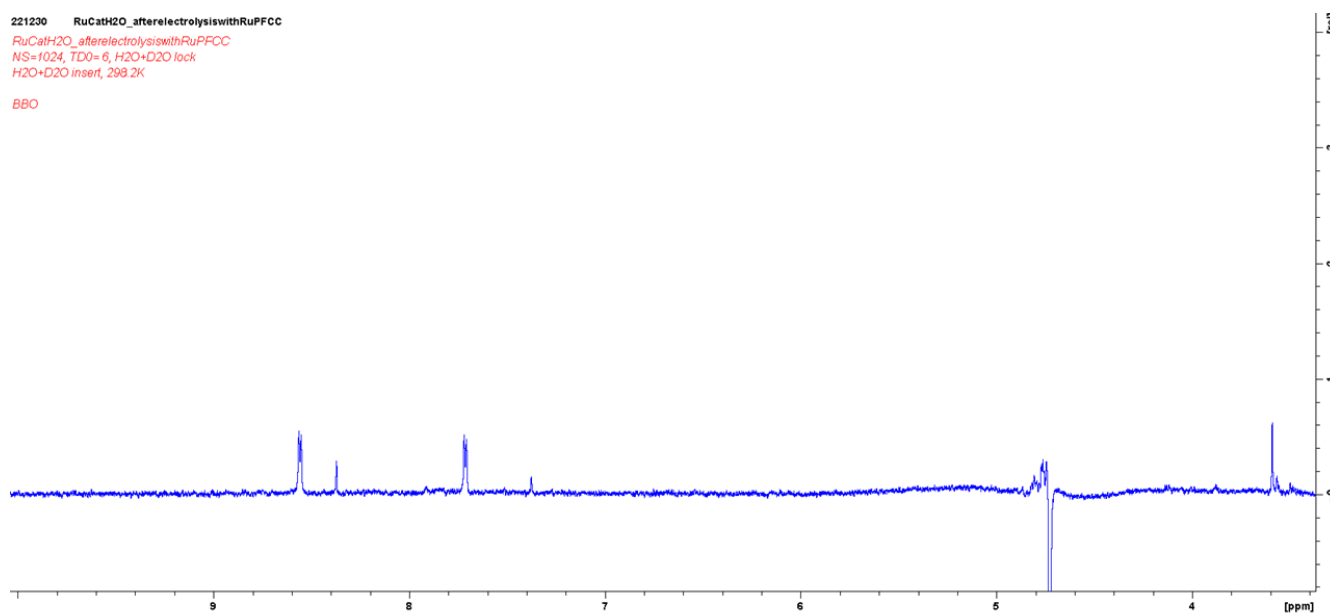

**Figure S25.** 500 MHz, <sup>1</sup>H NMR (3.4-10.0 ppm) of the electrolyte solution (with 10% D<sub>2</sub>O insert) after 4 months of multiple electrolysis experiments.

## Free energy diagram for OER and HER processes:

Free Energy Diagram (eV in vacuum)

|     |                                             | 1 H <sub>2</sub> O | 2 H <sub>2</sub> O | 1 H <sub>2</sub> O –<br>1 Pyridine |
|-----|---------------------------------------------|--------------------|--------------------|------------------------------------|
|     | H <sub>2</sub> O                            | 0                  | 0                  | 0                                  |
|     | *H <sub>2</sub> O                           | -0.69              | -0.15              | -0.32                              |
| HER | H <sup>+</sup> + e <sup>-</sup>             | 0.00               | 0                  | 0                                  |
|     | *H                                          | -0.20              | 0.12               | 0.65                               |
|     | 0.5 H <sub>2</sub>                          | 0.00               | 0                  | 0                                  |
| OER | 2 H <sub>2</sub> O                          | 0.00               | 0.00               |                                    |
|     | *OH + H <sub>2</sub> O + 0.5 H <sub>2</sub> | 0.22               | 0.96               |                                    |
|     | *O + H <sub>2</sub> O + H <sub>2</sub>      | 1.64               | 2.52               |                                    |
|     | *OOH + 1.5 H <sub>2</sub>                   | 3.02               | 3.93               |                                    |
|     | O <sub>2</sub> + 2 H <sub>2</sub>           | 4.92               | 4.92               |                                    |
|     |                                             |                    |                    | <b>H2O adsorption</b>              |
|     |                                             |                    |                    | 1 H2O                              |
|     |                                             |                    |                    | 2 H2O                              |
|     |                                             |                    |                    | 1 H2O +<br>1 Pyridine              |
|     |                                             |                    |                    | <b>Pyridine adsorption</b>         |
|     |                                             |                    |                    | Pyridine                           |

## Cartesian coordinates of all the optimized structures:

### Ru – 1 H<sub>2</sub>O

Ru N O C H  
1 5 5 23 17

```

8.604159200      7.413162871      7.815788459
6.753597065      7.837702055      8.390865205
5.132335873      9.297890930      8.866169820
8.769708706      9.322946987      8.169374681
12.361359070     9.111145824      7.647240875
10.566058502     7.751522861      7.595157701
7.921305216      7.872229265      5.767607391
6.319441038      3.829939004      7.032868351
7.659335754      5.634477490      6.917854308
9.181798260      6.205210324      9.345645872
10.179854066     4.296673719      9.949173969
5.576413188      7.164545925      8.310641659
5.394575808      5.849504738      7.867197408
4.068506284      5.410248583      7.871663491
3.013724171      6.263232813      8.262567898
3.208120939      7.599759674      8.634567238
4.529727647      8.057340422      8.638591025

```

|              |              |              |
|--------------|--------------|--------------|
| 6.497178194  | 9.130568972  | 8.673382828  |
| 7.621218561  | 10.031731821 | 8.533489125  |
| 7.663843649  | 11.425891140 | 8.613656485  |
| 8.832170492  | 12.109648663 | 8.247781349  |
| 9.951895693  | 11.407543354 | 7.796628598  |
| 9.930792864  | 10.005695134 | 7.775896854  |
| 10.972847686 | 9.048523975  | 7.510387715  |
| 12.792597378 | 7.833776920  | 8.004670568  |
| 14.019080641 | 7.284424575  | 8.393215190  |
| 13.979830594 | 5.985149260  | 8.922031787  |
| 12.776192560 | 5.286808043  | 9.148581606  |
| 11.547357352 | 5.823762697  | 8.746361076  |
| 11.630055667 | 7.031128564  | 8.051206418  |
| 6.525298966  | 5.019190646  | 7.269475349  |
| 4.436723565  | 10.535392403 | 9.162361392  |
| 13.177537644 | 10.307894619 | 7.630103034  |
| 10.229468351 | 5.365448273  | 9.340064575  |
| 3.861001994  | 4.394538487  | 7.533969886  |
| 1.994186938  | 5.875448001  | 8.241793035  |
| 2.359046654  | 8.237074118  | 8.883297862  |
| 6.783727444  | 11.979302551 | 8.935328117  |
| 8.854935362  | 13.198119778 | 8.289326502  |
| 10.840359997 | 11.943963267 | 7.466495843  |
| 14.956515058 | 7.839490840  | 8.349701590  |
| 14.917338184 | 5.531501487  | 9.246768787  |
| 12.776605457 | 4.353156011  | 9.711115951  |
| 4.838753000  | 11.003317137 | 10.071468589 |
| 3.378148288  | 10.310024436 | 9.330059662  |
| 4.512679637  | 11.243876710 | 8.323440161  |
| 14.233153391 | 10.014305867 | 7.633757696  |
| 12.987452122 | 10.937043893 | 8.514440328  |
| 12.988251784 | 10.895142682 | 6.721121928  |
| 8.698582615  | 7.910869765  | 5.180157126  |
| 7.627864767  | 6.902263524  | 5.782761758  |

# **Ru – 1 OH**

Ru N O C H  
1 5 5 23 16

|              |             |             |
|--------------|-------------|-------------|
| 8.541621629  | 7.472269869 | 7.697344496 |
| 6.745017038  | 7.891377366 | 8.394098476 |
| 5.109985859  | 9.326506264 | 8.880587245 |
| 8.714672534  | 9.391711333 | 8.116316103 |
| 12.311333195 | 9.129673273 | 7.655579175 |
| 10.514105992 | 7.801442899 | 7.656806106 |
| 8.267073180  | 8.103436589 | 5.858351318 |
| 6.359739007  | 3.905704307 | 6.971412021 |
| 7.662693156  | 5.731082334 | 6.905714351 |
| 9.136176402  | 6.158647688 | 9.228537945 |
| 10.135763586 | 4.249696226 | 9.864826026 |
| 5.578861171  | 7.192668004 | 8.338359987 |

|              |              |              |
|--------------|--------------|--------------|
| 5.413154542  | 5.885198120  | 7.877403544  |
| 4.093324533  | 5.427326646  | 7.881369185  |
| 3.030003225  | 6.261208834  | 8.288106104  |
| 3.208367567  | 7.598306695  | 8.667712027  |
| 4.524175423  | 8.071080356  | 8.671590123  |
| 6.468314599  | 9.187231906  | 8.662057559  |
| 7.578873094  | 10.094509813 | 8.496572077  |
| 7.631216288  | 11.488818742 | 8.604342129  |
| 8.809088762  | 12.163773456 | 8.263913080  |
| 9.933948391  | 11.455773911 | 7.831174754  |
| 9.886222195  | 10.057377171 | 7.774899890  |
| 10.930077562 | 9.086238071  | 7.554159376  |
| 12.740075828 | 7.836032827  | 7.979698790  |
| 13.973399331 | 7.260278590  | 8.297555044  |
| 13.936480323 | 5.943184677  | 8.780645905  |
| 12.733609285 | 5.247133994  | 9.025791118  |
| 11.496719971 | 5.807101778  | 8.690853861  |
| 11.571125066 | 7.048578692  | 8.060490722  |
| 6.552692595  | 5.090556832  | 7.248419560  |
| 4.396103838  | 10.562123567 | 9.144861613  |
| 13.147584315 | 10.312820638 | 7.601347237  |
| 10.170166012 | 5.325242749  | 9.261767011  |
| 3.900090018  | 4.414974605  | 7.525532935  |
| 2.015650888  | 5.860272727  | 8.267112379  |
| 2.351636230  | 8.225537173  | 8.915582230  |
| 6.757165489  | 12.046232379 | 8.935714228  |
| 8.846390614  | 13.250398295 | 8.329955703  |
| 10.842117423 | 11.986170231 | 7.549486191  |
| 14.917130428 | 7.801045028  | 8.223221161  |
| 14.880615172 | 5.465886135  | 9.046417678  |
| 12.745598979 | 4.286520502  | 9.541747147  |
| 4.770960792  | 11.046536744 | 10.056714053 |
| 3.335696983  | 10.330410575 | 9.287264711  |
| 4.489032134  | 11.256582441 | 8.296697890  |
| 14.196473498 | 9.999648021  | 7.565513391  |
| 13.001630432 | 10.945979325 | 8.490330929  |
| 12.932223221 | 10.897788620 | 6.697440452  |
| 7.906534999  | 7.305450965  | 5.416874862  |

# **Ru – 1 H**

| Ru | N | O | C  | H  |
|----|---|---|----|----|
| 1  | 5 | 4 | 23 | 16 |

|              |             |             |
|--------------|-------------|-------------|
| 8.543607063  | 7.380523751 | 8.171409767 |
| 6.632961873  | 7.952718711 | 8.345232240 |
| 4.983988233  | 9.434787864 | 8.665695887 |
| 8.641224550  | 9.391952407 | 8.289361128 |
| 12.281007474 | 9.166274114 | 7.860691667 |
| 10.514419585 | 7.812832847 | 8.100162159 |
| 6.211011136  | 3.889769225 | 7.196542180 |
| 7.617759895  | 5.606609552 | 7.456808442 |

|              |              |             |
|--------------|--------------|-------------|
| 9.375328074  | 5.769096303  | 9.293558125 |
| 10.575599560 | 3.923054476  | 9.726239612 |
| 5.449678945  | 7.268842937  | 8.283865416 |
| 5.265373982  | 5.918729673  | 7.989444989 |
| 3.942579869  | 5.472758388  | 8.011424571 |
| 2.879785789  | 6.356075852  | 8.291385761 |
| 3.072102719  | 7.722341101  | 8.531369107 |
| 4.393460839  | 8.179299890  | 8.515221043 |
| 6.350754576  | 9.259147859  | 8.539501611 |
| 7.479489034  | 10.137958081 | 8.472927841 |
| 7.527253122  | 11.535281420 | 8.498948195 |
| 8.739344439  | 12.193390980 | 8.272224593 |
| 9.897376949  | 11.452133622 | 8.022924930 |
| 9.844237359  | 10.055376057 | 8.048544147 |
| 10.901134262 | 9.094850764  | 7.942668065 |
| 12.767918939 | 7.868481832  | 8.032749528 |
| 14.048371505 | 7.310315572  | 8.087476027 |
| 14.122902037 | 5.943163118  | 8.386465107 |
| 12.986558383 | 5.163147662  | 8.684781270 |
| 11.703296549 | 5.711864982  | 8.635417859 |
| 11.635585352 | 7.045902700  | 8.231714296 |
| 6.425851534  | 5.058254170  | 7.540667703 |
| 4.280575307  | 10.688192406 | 8.854846511 |
| 13.089350150 | 10.365270977 | 7.753329939 |
| 10.480024345 | 5.047911164  | 9.226141574 |
| 3.751279828  | 4.424263809  | 7.780434802 |
| 1.861141805  | 5.965841750  | 8.299182459 |
| 2.222626317  | 8.382026464  | 8.709909845 |
| 6.618903774  | 12.105753580 | 8.679090869 |
| 8.779297456  | 13.281706606 | 8.280502134 |
| 10.840967583 | 11.955828830 | 7.823657675 |
| 14.954113461 | 7.896183174  | 7.930178582 |
| 15.107610554 | 5.476309825  | 8.436432184 |
| 13.092637647 | 4.127851742  | 9.010275466 |
| 4.645312690  | 11.211372827 | 9.749214198 |
| 3.215629524  | 10.473910594 | 8.992481040 |
| 4.392154203  | 11.343076535 | 7.977888445 |
| 14.137984539 | 10.069313293 | 7.644727561 |
| 12.995721823 | 10.989110081 | 8.655070321 |
| 12.804431583 | 10.953688479 | 6.870818016 |
| 8.515987385  | 7.633000500  | 6.625666270 |

# **Ru – 1 OOH**

Ru N O C H  
1 5 6 23 16

|             |             |             |
|-------------|-------------|-------------|
| 8.565644790 | 7.515185030 | 7.605022152 |
| 6.740135445 | 7.915881369 | 8.227421343 |
| 5.126314239 | 9.337788415 | 8.795990387 |
| 8.749097172 | 9.417520012 | 8.063102035 |

|              |              |              |
|--------------|--------------|--------------|
| 12.353865511 | 9.151654815  | 7.684091284  |
| 10.557492195 | 7.821507605  | 7.544458908  |
| 8.321929036  | 8.243600766  | 5.801246741  |
| 8.019424452  | 7.308550960  | 4.772207976  |
| 6.314954703  | 3.930679352  | 6.796081689  |
| 7.666665983  | 5.724378637  | 6.772751046  |
| 9.138525080  | 6.230473483  | 9.128127522  |
| 10.062269217 | 4.269078868  | 9.721156144  |
| 5.578143828  | 7.216329227  | 8.196388732  |
| 5.410381533  | 5.898909308  | 7.761482696  |
| 4.097125538  | 5.427991397  | 7.837080750  |
| 3.045067108  | 6.256416745  | 8.285132853  |
| 3.224918075  | 7.598411879  | 8.645942814  |
| 4.534244362  | 8.084884968  | 8.583055718  |
| 6.479589564  | 9.201422629  | 8.546843601  |
| 7.603112503  | 10.109913094 | 8.433860724  |
| 7.657007981  | 11.500156425 | 8.577487487  |
| 8.847546334  | 12.176748354 | 8.283244110  |
| 9.978552379  | 11.479493279 | 7.850922601  |
| 9.930604708  | 10.081702818 | 7.754900516  |
| 10.975485785 | 9.110414108  | 7.515397358  |
| 12.767580521 | 7.850821990  | 7.989203915  |
| 13.982213899 | 7.266210065  | 8.363408204  |
| 13.919231418 | 5.939736464  | 8.816253049  |
| 12.703226072 | 5.244451796  | 8.990131055  |
| 11.487297817 | 5.816041130  | 8.603484322  |
| 11.595884516 | 7.062320585  | 7.983306412  |
| 6.530812971  | 5.101814483  | 7.102848522  |
| 4.417692409  | 10.564904089 | 9.109737270  |
| 13.192830515 | 10.334404962 | 7.702967605  |
| 10.143790252 | 5.353980253  | 9.144841360  |
| 3.895433819  | 4.406831648  | 7.512214392  |
| 2.036683812  | 5.842345678  | 8.324265302  |
| 2.375677521  | 8.214884821  | 8.941366083  |
| 6.775460356  | 12.054136222 | 8.894012279  |
| 8.885579249  | 13.261702005 | 8.375621986  |
| 10.889564652 | 12.017494222 | 7.594463224  |
| 14.927984656 | 7.808748956  | 8.360489832  |
| 14.846795506 | 5.455547702  | 9.125218950  |
| 12.685466272 | 4.280506382  | 9.499717886  |
| 4.811458349  | 11.025200681 | 10.026052526 |
| 3.360701427  | 10.327797302 | 9.267985293  |
| 4.491386366  | 11.281241281 | 8.278316132  |
| 14.241560288 | 10.021255211 | 7.655824169  |
| 13.042809074 | 10.918384474 | 8.624527699  |
| 12.985025699 | 10.967866789 | 6.830830374  |
| 7.815469639  | 6.473826644  | 5.310784165  |

# Ru – 1 O

| Ru | N | O | C  | H  |
|----|---|---|----|----|
| 1  | 5 | 5 | 23 | 15 |

|              |              |              |
|--------------|--------------|--------------|
| 8.532994563  | 7.548052158  | 7.485667463  |
| 6.783914293  | 7.909770231  | 8.353493448  |
| 5.136175750  | 9.313912251  | 8.846881256  |
| 8.691571205  | 9.455495435  | 7.962177451  |
| 12.306514320 | 9.146296299  | 7.653183457  |
| 10.482099937 | 7.866334375  | 7.676306999  |
| 8.417041702  | 7.913296842  | 5.762212943  |
| 6.375742034  | 3.851779756  | 7.016387094  |
| 7.706468083  | 5.656372794  | 6.876015815  |
| 9.052945632  | 6.238374059  | 9.121600874  |
| 9.994077831  | 4.342052216  | 9.880145030  |
| 5.634213549  | 7.174873578  | 8.329448075  |
| 5.474108796  | 5.861373568  | 7.881537088  |
| 4.156633999  | 5.397542199  | 7.915541643  |
| 3.088723785  | 6.218658224  | 8.336404606  |
| 3.259263662  | 7.558537260  | 8.704765618  |
| 4.570448313  | 8.039788377  | 8.675682508  |
| 6.481047770  | 9.204423320  | 8.601151323  |
| 7.570797428  | 10.135346116 | 8.415667774  |
| 7.626609742  | 11.513476274 | 8.600726013  |
| 8.816556189  | 12.203983880 | 8.307198019  |
| 9.949812261  | 11.510071180 | 7.881559301  |
| 9.893993414  | 10.118704796 | 7.732683780  |
| 10.927888946 | 9.141889669  | 7.549307835  |
| 12.701294864 | 7.843470854  | 7.992750779  |
| 13.919301977 | 7.244352001  | 8.324297314  |
| 13.853797688 | 5.928709107  | 8.809853798  |
| 12.637029266 | 5.252902793  | 9.039066542  |
| 11.413978537 | 5.835528956  | 8.692351267  |
| 11.515983709 | 7.079975201  | 8.073787053  |
| 6.606171910  | 5.045167228  | 7.244306922  |
| 4.409403435  | 10.531901724 | 9.157281844  |
| 13.167176019 | 10.310876363 | 7.584378605  |
| 10.064115494 | 5.390264235  | 9.232818485  |
| 3.970809745  | 4.380727996  | 7.567732060  |
| 2.078448806  | 5.806843718  | 8.333981449  |
| 2.403961949  | 8.182604373  | 8.964026422  |
| 6.756158072  | 12.054243366 | 8.967558260  |
| 8.857730257  | 13.285211004 | 8.431973941  |
| 10.877584757 | 12.044336450 | 7.681438159  |
| 14.873373794 | 7.767272401  | 8.256517519  |
| 14.786760797 | 5.436344069  | 9.087339565  |
| 12.625473375 | 4.290293088  | 9.551465254  |
| 4.792536623  | 10.991058276 | 10.078795552 |
| 3.354528551  | 10.281690029 | 9.306481410  |
| 4.485094586  | 11.251239606 | 8.329328517  |
| 14.208384794 | 9.976619864  | 7.526801026  |
| 13.051500818 | 10.946162907 | 8.476526971  |
| 12.943934602 | 10.899897531 | 6.684792213  |

**Ru – 2 H<sub>2</sub>O**

Ru N O C H  
1 5 6 23 19

|              |              |              |
|--------------|--------------|--------------|
| 8.728200814  | 7.582740381  | 8.409840672  |
| 6.659585410  | 7.912752602  | 8.317768016  |
| 5.027957915  | 9.455281384  | 8.515341148  |
| 8.685960640  | 9.501668222  | 8.269603477  |
| 12.385552825 | 9.301822167  | 8.033585345  |
| 10.629861887 | 7.964967112  | 8.349605272  |
| 8.583228962  | 7.162178409  | 6.460056219  |
| 5.717242239  | 3.622527094  | 7.726929548  |
| 7.101880290  | 5.040925793  | 6.723534319  |
| 9.334651172  | 5.580276903  | 9.071780667  |
| 10.697020588 | 3.821228520  | 9.389763186  |
| 8.692446866  | 7.508930816  | 10.613517617 |
| 5.442392338  | 7.260157137  | 8.197678105  |
| 5.126167267  | 5.906638989  | 7.937435932  |
| 3.768893145  | 5.570289501  | 8.015788730  |
| 2.761755660  | 6.513374198  | 8.271988119  |
| 3.057600536  | 7.864994432  | 8.436117465  |
| 4.407466262  | 8.218527062  | 8.383722637  |
| 6.386716395  | 9.242117921  | 8.434892478  |
| 7.485614245  | 10.186199595 | 8.397596026  |
| 7.488522855  | 11.587655578 | 8.424403974  |
| 8.696835913  | 12.281250550 | 8.283923088  |
| 9.903566615  | 11.586691268 | 8.143774746  |
| 9.904233661  | 10.188866474 | 8.148565589  |
| 11.001962710 | 9.245722324  | 8.145255837  |
| 12.866148973 | 7.996777582  | 8.186531048  |
| 14.135477503 | 7.406780598  | 8.150997271  |
| 14.186144283 | 6.020828054  | 8.350058680  |
| 13.042042770 | 5.233620863  | 8.604243863  |
| 11.765609967 | 5.798925042  | 8.646095308  |
| 11.734173200 | 7.177968658  | 8.403958120  |
| 6.042328377  | 4.780058387  | 7.485158876  |
| 4.337085354  | 10.716244722 | 8.708276968  |
| 13.192177208 | 10.484394813 | 7.805399945  |
| 10.527822735 | 4.992240227  | 9.043446548  |
| 3.512448105  | 4.524486845  | 7.849525620  |
| 1.724185083  | 6.182736090  | 8.319172015  |
| 2.266054930  | 8.597214069  | 8.596501290  |
| 6.560366016  | 12.143585502 | 8.537194920  |
| 8.697114884  | 13.369000036 | 8.290611845  |
| 10.843122042 | 12.131982423 | 8.049556566  |
| 15.050143803 | 7.975799920  | 7.981406115  |
| 15.158449663 | 5.529603591  | 8.321787934  |
| 13.134711913 | 4.162895106  | 8.789529229  |
| 4.701879047  | 11.231937571 | 9.606470945  |
| 3.267535913  | 10.513999652 | 8.838799197  |
| 4.458985633  | 11.373172395 | 7.835182489  |
| 14.225303369 | 10.172123021 | 7.610471480  |

|              |              |              |
|--------------|--------------|--------------|
| 13.189846139 | 11.147022108 | 8.683270894  |
| 12.830494330 | 11.038026335 | 6.929351124  |
| 9.409214677  | 6.747514016  | 6.145998886  |
| 7.933873342  | 6.421456381  | 6.646516266  |
| 7.770711573  | 7.512894548  | 10.930439787 |
| 8.948673040  | 6.544366702  | 10.505577620 |

## References:

1. G. Kresse, J. Furthmuller, Efficiency of ab-initio total energy calculations for metals and semiconductors using a plane-wave basis set, *Comput. Mater. Sci.* **1996**, 6, 15-50.
2. G. Kresse, J. Furthmuller, Efficient iterative schemes for ab initio total-energy calculations using a plane-wave basis set, *Phys. Rev. B.* **1996**, 54, 11169-11186.
3. P.E. Blochl, Projector augmented-wave method, *Phys. Rev. B Condens. Matter.* **1994**, 50 17953-17979.
4. G. Kresse, D. Joubert, From ultrasoft pseudopotentials to the projector augmented wave method, *Phys. Rev. B*, **1999**, 59, 1758-1775.
5. J.P. Perdew, K. Burke, M. Ernzerhof, Generalized Gradient Approximation Made Simple, *Phys. Rev. Lett.* **1996**, 77, 3865-3868.
6. S. Grimme, J. Antony, S. Ehrlich, H. Krieg, A consistent and accurate ab initio parametrization of density functional dispersion correction (DFT-D) for the 94 elements H-Pu, *J. Chem. Phys.* **2010**, 132 154104.
7. H. Peng, M.T. Tang, X. Liu, P.S. Lamoureux, M. Bajdich, F. Abild-Pedersen, The role of atomic carbon in directing electrochemical CO<sub>2</sub> reduction to multicarbon products, *Energy Environ. Sci.* **2021**, 14, 473-482.
8. Lee, L. Z.; Ahmad Zaini, M. A., Metal chloride salts in the preparation of activated carbon and their hazardous outlook. *Desalination and Water Treatment* **2016**, 57, 16078-16085.
9. Ganiyu, S. A.; Alhooshani, K.; Sulaiman, K. O.; Qamaruddin, M.; Bakare, I. A.; Tanimu, A.; Saleh, T. A., Influence of aluminium impregnation on activated carbon for enhanced desulfurization of DBT at ambient temperature: Role of surface acidity and textural properties. *Chemical Engineering Journal* **2016**, 303, 489-500.
10. Alvarado Ávila, M. I.; Toledo-Carrillo, E.; Dutta, J., Improved chlorate production with platinum nanoparticles deposited on fluorinated activated carbon cloth electrodes. *Cleaner Engineering and Technology* **2020**, 1, 100016.
11. Park, M.-S.; Lee, Y.-S., Functionalization of graphene oxide by fluorination and its characteristics. *Journal of Fluorine Chemistry* **2016**, 182, 91-97.
12. Bokobza, L.; Bruneel, J.-L.; Couzi, M., Raman Spectra of Carbon-Based Materials (from Graphite to Carbon Black) and of Some Silicone Composites. *C* **2015**, 1 (1).
13. Bahuguna, G.; Chaudhary, S.; Sharma, R. K.; Gupta, R., Electrophilic Fluorination of Graphitic Carbon for Enhancement in Electric Double-Layer Capacitance. *Energy Technology* **2019**, 7, 1900667.
14. Henry, D. G.; Jarvis, I.; Gillmore, G.; Stephenson, M., Raman spectroscopy as a tool to determine the thermal maturity of organic matter: Application to sedimentary, metamorphic and structural geology. *Earth-Science Reviews* **2019**, 198, 102936.
15. Kordek, K.; Jiang, L.; Fan, K.; Zhu, Z.; Xu, L.; Al-Mamun, M.; Dou, Y.; Chen, S.; Liu, P.; Yin, H.; Rutkowski, P.; Zhao, H., Two-Step Activated Carbon Cloth with Oxygen-Rich Functional Groups as a High-Performance Additive-Free Air Electrode for Flexible Zinc–Air Batteries. *Advanced Energy Materials* **2019**, 9 (4), 1802936.

16. Li, L.; Yao, X.; Li, H.; Liu, Z.; Ma, W.; Liang, X., Thermal stability of oxygen-containing functional groups on activated carbon surfaces in a thermal oxidative environment. *Journal of Chemical Engineering of Japan* **2014**, *47*, 21-27.
17. Avilés, F.; Cauich-Rodríguez, J. V.; Moo-Tah, L.; May-Pat, A.; Vargas-Coronado, R., Evaluation of mild acid oxidation treatments for MWCNT functionalization. *Carbon* **2009**, *47*, 2970-2975.
18. Berenguer, R.; Ruiz-Rosas, R.; Gallardo, A.; Cazorla-Amorós, D.; Morallón, E.; Nishihara, H.; Kyotani, T.; Rodríguez-Mirasol, J.; Cordero, T., Enhanced electro-oxidation resistance of carbon electrodes induced by phosphorus surface groups. *Carbon* **2015**, *95*, 681-689.
19. Zhao, Z.; Yang, Z.; Hu, Y.; Li, J.; Fan, X., Multiple functionalization of multi-walled carbon nanotubes with carboxyl and amino groups. *Applied Surface Science* **2013**, *276*, 476-481.
20. A. Shatskiy, A. A. Bardin, M. Oschmann, R. Matheu, J. Benet-Buchholz, L. Eriksson, M. D. Kärkäs, E. V. Johnston, C. Gimbert-Suriñach, A. Llobet, B. Åkerman, *ChemSusChem* **2019**, *12*, 2251–2262.
